# Supplementary material for: Extracellular vesicles from vaginal Gardnerella vaginalis and Mobiluncus mulieris contain distinct proteomic cargo and induce inflammatory pathways
Source: PubMed Central journal article supplement (PMC10957959; doi:10.1038/s41522-024-00502-y), 2024-03-21
Supplement: 41522_2024_502_MOESM1_ESM.pdf [file 41522_2024_502_MOESM1_ESM.pdf]

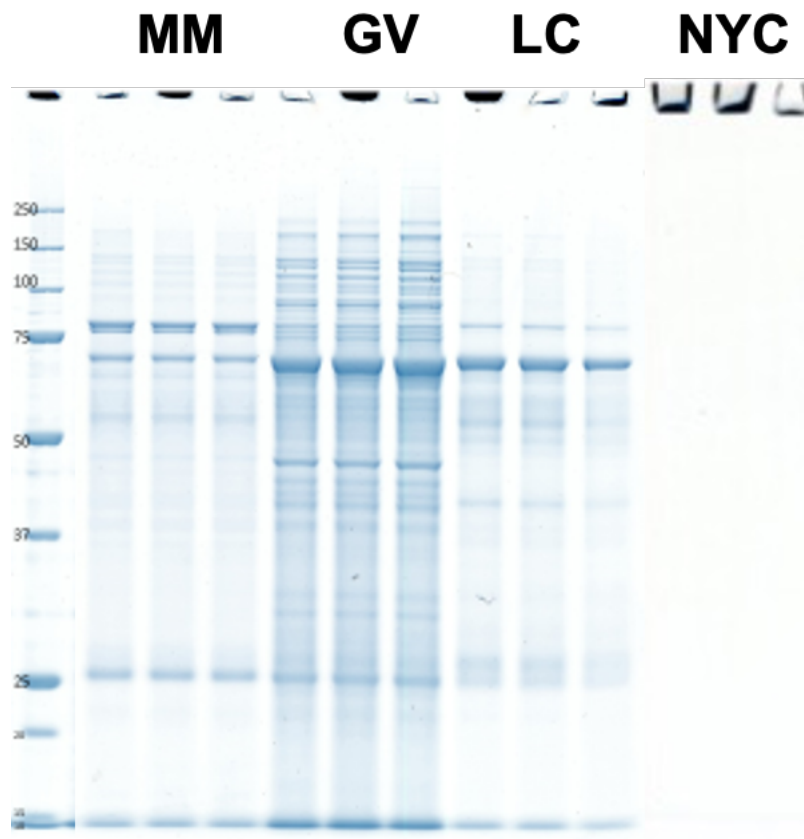

Supplemental Figure 1. Protein profile of bEVs isolated from *M. mulieris* (MM), *G. vaginalis* (GV), *L. crispatus* (LC), and NYC media controls.

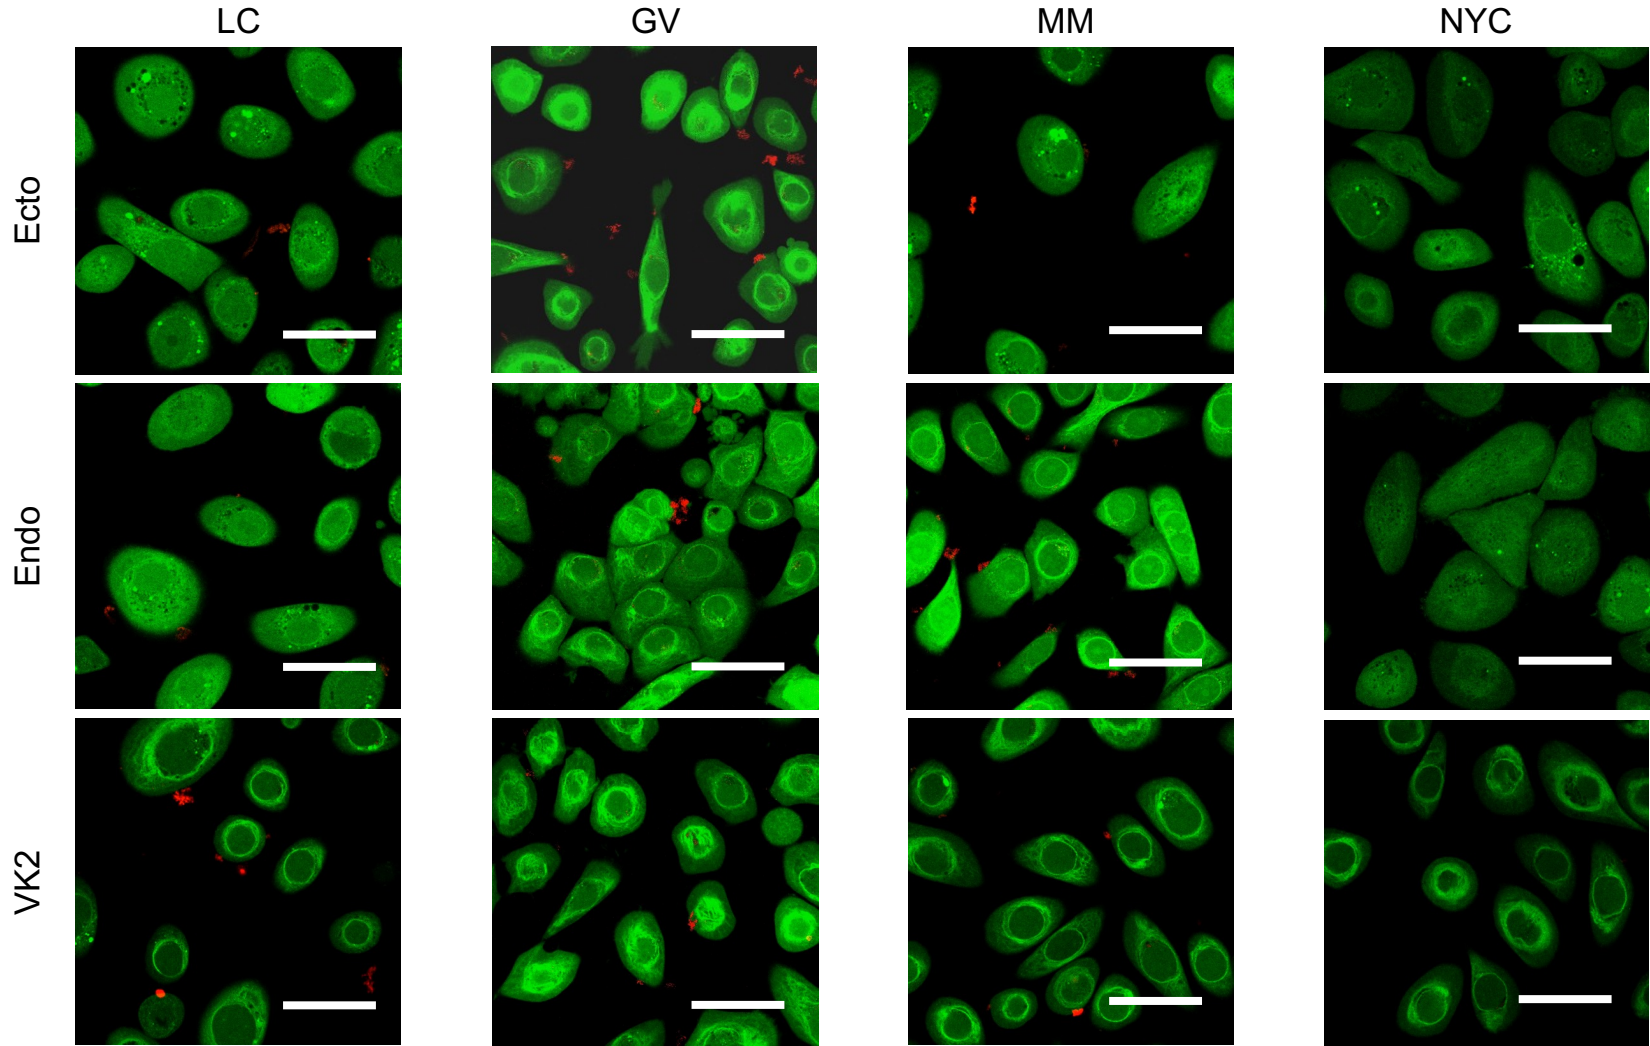

Supplemental Figure 2. Representative images from live videos of bEV (red) uptake by cervicovaginal epithelial cells (green). Video files (.avi), named by cell type and bEV type, are available separately. All scale bars are 20  $\mu$ m.

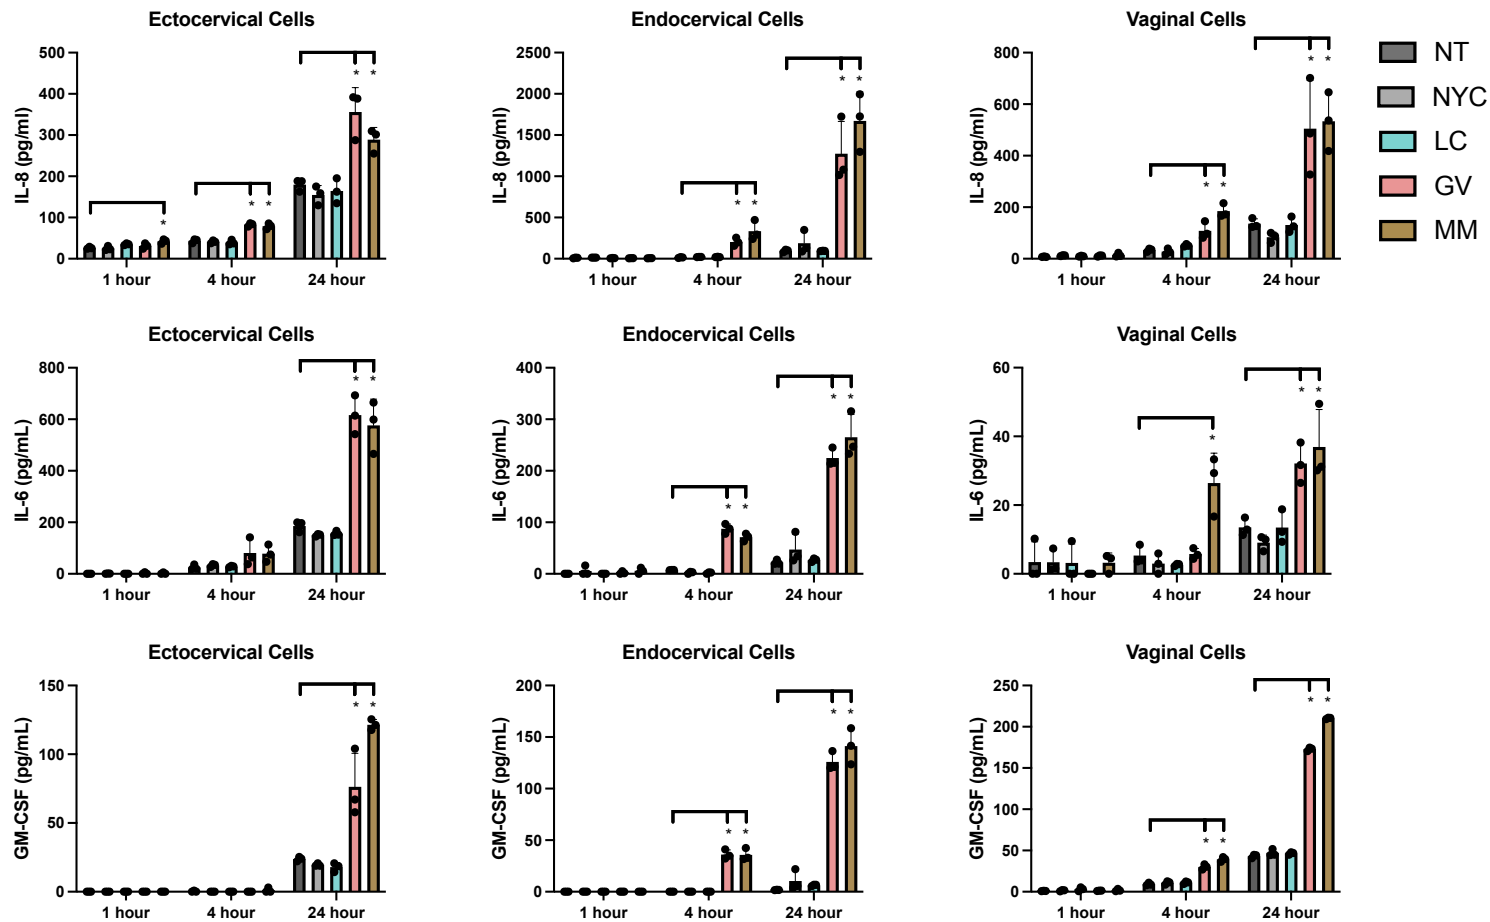

Supplemental Figure 3. Levels of cytokines IL-8, IL-6, and GM-CSF from ectocervical, endocervical, and vaginal epithelial cells after 1, 4, and 24 h of exposure to bEVs. \* $p < 0.05$  relative to non-treated cells at the same timepoint via one-way ANOVA with Tukey's correction for multiple comparisons.

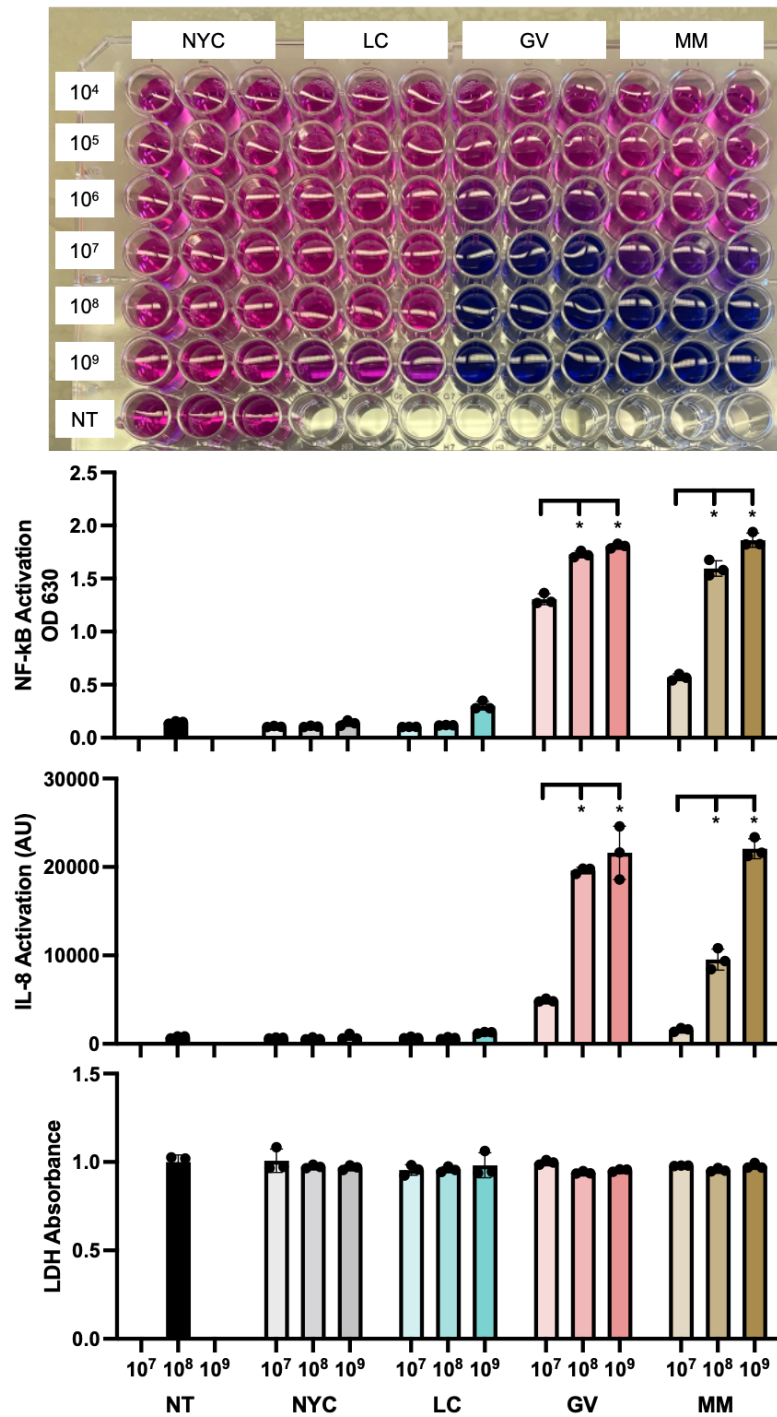

Supplemental Figure 4. 24 h exposure of *G. vaginalis* and *M. mulieris* bEVs to HEK-TLR2 reporter cells resulted in dose-dependent increases in NF-kB activation and IL-8 release without inducing cell death as measured by lactate dehydrogenase (LDH). \*p<0.05 relative to lowest dose via one-way ANOVA with Tukey's correction for multiple comparisons.

## Supplemental Tables

Supplemental Table 1. List of proteins shared between bEVs from *L. crispatus*, *G. vaginalis*, and *M. mulieris*.

| Protein Name                                                    |
|-----------------------------------------------------------------|
| 30S ribosomal protein S13                                       |
| 50S ribosomal protein L3                                        |
| 50S ribosomal protein L4                                        |
| ABC transporter, ATP-binding protein                            |
| ABC transporter, solute-binding protein                         |
| ABC transporter, substrate-binding protein                      |
| ABC transporter, substrate-binding protein, family 5            |
| adenylate kinase                                                |
| adenylosuccinate synthase                                       |
| alanine racemase                                                |
| alanine--tRNA ligase                                            |
| aspartate--tRNA ligase                                          |
| ATP synthase F1, alpha subunit                                  |
| ATP synthase F1, beta subunit                                   |
| ATPase family associated with various cellular activities (AAA) |
| chaperone protein DnaK                                          |
| chaperonin GroL                                                 |
| cysteine--tRNA ligase                                           |
| D-ala D-ala ligase N-terminal domain protein                    |
| DNA polymerase III, beta subunit                                |
| DNA-directed RNA polymerase, alpha subunit                      |
| DNA-directed RNA polymerase, beta subunit                       |
| DNA-directed RNA polymerase, beta' subunit                      |
| dTMP kinase                                                     |
| fructose-bisphosphate aldolase, class-II                        |
| glutamate--tRNA ligase                                          |
| glutamine synthetase, type I                                    |
| glutamine-fructose-6-phosphate transaminase (isomerizing)       |
| glyceraldehyde-3-phosphate dehydrogenase, type I                |
| GMP synthase (glutamine-hydrolyzing) domain protein             |
| GTP-binding protein TypA                                        |
| GTP-binding protein YchF                                        |
| histidine triad domain protein                                  |
| histidine--tRNA ligase                                          |
| homoserine dehydrogenase                                        |
| hypothetical protein                                            |
| hypoxanthine phosphoribosyltransferase                          |
| isoleucine--tRNA ligase                                         |
| L-lactate dehydrogenase                                         |
| leucine--tRNA ligase                                            |
| lysine--tRNA ligase                                             |
| methionine adenosyltransferase                                  |
| methionine aminopeptidase, type I                               |
| methionine--tRNA ligase                                         |
| methionyl-tRNA formyltransferase                                |
| nitroreductase family protein                                   |

|                                                             |
|-------------------------------------------------------------|
| NlpC/P60 family protein                                     |
| oxidoreductase, aldo/keto reductase family protein          |
| peptide deformylase                                         |
| phenylalanine--tRNA ligase, beta subunit                    |
| phosphate acetyltransferase                                 |
| phosphoenolpyruvate carboxykinase (GTP)                     |
| phosphoglucosamine mutase                                   |
| phosphoglycerate kinase                                     |
| phosphoglycerate mutase 1 family                            |
| phosphopyruvate hydratase                                   |
| proline--tRNA ligase                                        |
| pyruvate kinase                                             |
| ribonucleoside-diphosphate reductase, alpha subunit         |
| ribonucleoside-diphosphate reductase, beta subunit          |
| ribose-phosphate diphosphokinase                            |
| ribosomal protein L1                                        |
| ribosomal protein L10                                       |
| ribosomal protein L13                                       |
| ribosomal protein L14                                       |
| ribosomal protein L20                                       |
| ribosomal protein L5                                        |
| ribosomal protein L7/L12                                    |
| ribosomal protein S10                                       |
| ribosomal protein S2                                        |
| ribosomal protein S3                                        |
| ribosomal protein S5                                        |
| ribosomal subunit interface protein                         |
| RNA polymerase sigma factor RpoD                            |
| serine--tRNA ligase                                         |
| signal recognition particle protein                         |
| Sua5/YciO/YrdC/YwlC family protein                          |
| threonine synthase                                          |
| threonine--tRNA ligase                                      |
| transcription termination factor NusA                       |
| translation elongation factor G                             |
| translation elongation factor Tu                            |
| trigger factor                                              |
| tryptophan--tRNA ligase                                     |
| tyrosine--tRNA ligase                                       |
| UDP-glucose 4-epimerase                                     |
| UDP-N-acetylmuramoyl-L-alanine--D-glutamate ligase          |
| UDP-N-acetylmuramoyl-tripeptide--D-alanyl-D- alanine ligase |
| UMP kinase                                                  |
| uracil phosphoribosyltransferase                            |

Supplemental Table 2. List of proteins, their abundance, and their associated functional pathway identified in *G. vaginalis* bEVs.

| <b>Protein Name</b>                             | <b>Abundance (ppm)</b> | <b>Functional pathway</b>            |
|-------------------------------------------------|------------------------|--------------------------------------|
| [glutamate--ammonia-ligase] adenylyltransferase | 2556                   | Coenzyme transport & metabolism      |
| 1,4-alpha-glucan branching enzyme               | 6893                   | Carbohydrate transport & metabolism  |
| 16S rRNA methyltransferase GidB                 | 852                    | Translation                          |
| 16S rRNA processing protein RimM                | 232                    | Translation                          |
| 2-dehydropantoate 2-reductase                   | 697                    | Coenzyme transport & metabolism      |
| 2-dehydropantoate 2-reductase                   | 2014                   | Coenzyme transport & metabolism      |
| 3-dehydroquininate dehydratase, type II         | 155                    | Amino acid transport & metabolism    |
| 3-dehydroquininate synthase                     | 1162                   | Coenzyme transport & metabolism      |
| 3-deoxy-7-phosphoheptulonate synthase           | 1162                   | Amino acid transport & metabolism    |
| 3-phosphoshikimate 1-carboxyvinyltransferase    | 774                    | Amino acid transport & metabolism    |
| 30S ribosomal protein S1                        | 13166                  | Translation                          |
| 30S ribosomal protein S13                       | 310                    | Translation                          |
| 30S ribosomal protein S17                       | 155                    | Translation                          |
| 4-alpha-glucanotransferase                      | 620                    | Carbohydrate transport & metabolism  |
| 50S ribosomal protein L3                        | 697                    | Translation                          |
| 50S ribosomal protein L4                        | 1084                   | Translation                          |
| 6-phosphogluconolactonase                       | 465                    | Carbohydrate transport & metabolism  |
| ABC transporter, ATP-binding protein            | 620                    | Cell wall/ membrane                  |
| ABC transporter, ATP-binding protein            | 620                    | Carbohydrate transport & metabolism  |
| ABC transporter, ATP-binding protein            | 697                    | Defense mechanisms                   |
| ABC transporter, ATP-binding protein            | 1769                   | Inorganic ion transport & metabolism |
| ABC transporter, ATP-binding protein            | 7048                   | Amino acid transport & metabolism    |
| ABC transporter, permease protein               | 155                    | Amino acid transport & metabolism    |
| ABC transporter, solute-binding protein         | 3485                   | Carbohydrate transport & metabolism  |

|                                                      |       |                                        |
|------------------------------------------------------|-------|----------------------------------------|
| ABC transporter, substrate-binding protein           | 852   | Inorganic ion transport & metabolism   |
| ABC transporter, substrate-binding protein, family 3 | 1007  | Signal transduction mechanisms         |
| ABC transporter, substrate-binding protein, family 3 | 1007  | Amino acid transport & metabolism      |
| ABC transporter, substrate-binding protein, family 5 | 3717  | Amino acid transport & metabolism      |
| acetate kinase                                       | 10068 | Coenzyme transport & metabolism        |
| acetyl-CoA C-acetyltransferase                       | 852   | Lipid transport & metabolism           |
| acetyltransferase, GNAT family                       | 151   | Translation                            |
| acetyltransferase, GNAT family                       | 155   | Transcription                          |
| acetyltransferase, GNAT family                       | 308   | Replication, recombination, and repair |
| Acyltransferase                                      | 387   | Lipid transport & metabolism           |
| adenine phosphoribosyltransferase                    | 929   | Nucleotide transport & metabolism      |
| adenylate kinase                                     | 155   | Nucleotide transport & metabolism      |
| adenylosuccinate synthase                            | 2866  | Nucleotide transport & metabolism      |
| alanine racemase                                     | 929   | Cell wall/ membrane                    |
| alanine--tRNA ligase                                 | 9603  | Translation                            |
| alcohol dehydrogenase, iron-dependent                | 1007  | Energy production & conversion         |
| aldehyde dehydrogenase (NAD) family protein          | 7048  | Energy production & conversion         |
| aldose 1-epimerase                                   | 852   | Carbohydrate transport & metabolism    |
| alkyl hydroperoxide reductase, F subunit             | 154   | Posttranslational modification         |
| alkyl hydroperoxide reductase, F subunit             | 1549  | Posttranslational modification         |
| alpha amylase, catalytic domain protein              | 465   | Carbohydrate transport & metabolism    |
| alpha amylase, catalytic domain protein              | 1162  | Cell wall/ membrane                    |
| amidohydrolase family protein                        | 1084  | Nucleotide transport & metabolism      |
| amidophosphoribosyltransferase                       | 1239  | Nucleotide transport & metabolism      |
| amino acid kinase family                             | 465   | Amino acid transport & metabolism      |
| amino acid permease                                  | 232   | Amino acid transport & metabolism      |
| aminoacyl-tRNA hydrolase                             | 774   | Translation                            |
| aminopeptidase P domain protein                      | 1239  | Amino acid transport & metabolism      |



|                                                                    |      |                                      |
|--------------------------------------------------------------------|------|--------------------------------------|
| aminotransferase, class I/II                                       | 2788 | Amino acid transport & metabolism    |
| AMP-binding enzyme                                                 | 3872 | Lipid transport & metabolism         |
| anaerobic ribonucleoside-triphosphate reductase                    | 5576 | Nucleotide transport & metabolism    |
| anaerobic ribonucleoside-triphosphate reductase activating protein | 620  | Posttranslational modification       |
| anchored repeat ABC transporter, substrate-binding protein         | 154  | Inorganic ion transport & metabolism |
| arginine--tRNA ligase                                              | 1317 | Translation                          |
| argininosuccinate lyase                                            | 929  | Amino acid transport & metabolism    |
| argininosuccinate synthase                                         | 1084 | Amino acid transport & metabolism    |
| arylsulfatase                                                      | 151  | Cell wall/ membrane                  |
| aspartate carbamoyltransferase                                     | 1859 | Nucleotide transport & metabolism    |
| aspartate--tRNA ligase                                             | 7357 | Translation                          |
| aspartate-semialdehyde dehydrogenase                               | 2246 | Amino acid transport & metabolism    |
| aspartyl/glutamyl-tRNA(Asn/Gln) amidotransferase, A subunit        | 3485 | Nucleotide transport & metabolism    |
| aspartyl/glutamyl-tRNA(Asn/Gln) amidotransferase, B subunit        | 5034 | Translation                          |
| ATP synthase F1, alpha subunit                                     | 542  | Energy production & conversion       |
| ATP synthase F1, alpha subunit                                     | 3408 | Energy production & conversion       |
| ATP synthase F1, beta subunit                                      | 852  | Energy production & conversion       |
| ATP synthase F1, beta subunit                                      | 5421 | Energy production & conversion       |
| ATP synthase F1, delta subunit                                     | 620  | Energy production & conversion       |
| ATP synthase F1, gamma subunit                                     | 1084 | Energy production & conversion       |
| ATP-dependent chaperone protein ClpB                               | 232  | Posttranslational modification       |
| ATP-dependent metallopeptidase HflB                                | 1007 | Posttranslational modification       |
| ATPase family associated with various cellular activities (AAA)    | 226  | Posttranslational modification       |
| ATPase family associated with various cellular activities (AAA)    | 6041 | Posttranslational modification       |
| ATPase/histidine kinase/DNA gyrase B/HSP90 domain protein          | 774  | Signal transduction mechanisms       |
| Beta galactosidase small chain                                     | 774  | Carbohydrate transport & metabolism  |
| bifunctional protein FolC                                          | 1007 | Coenzyme transport & metabolism      |
| branched-chain amino acid transport system II carrier protein      | 154  | Intracellular trafficking            |

|                                                                              |      |                                                              |
|------------------------------------------------------------------------------|------|--------------------------------------------------------------|
| branched-chain-amino-acid transaminase                                       | 2169 | Amino acid transport & metabolism                            |
| BRCA1 C-terminal domain protein                                              | 620  | Replication, recombination, and repair                       |
| Carbamoyl-phosphate synthase L chain, ATP binding domain protein             | 2711 | Lipid transport & metabolism                                 |
| carbamoyl-phosphate synthase, large subunit                                  | 154  | Nucleotide transport & metabolism                            |
| carbamoyl-phosphate synthase, large subunit                                  | 154  | Amino acid transport & metabolism                            |
| carbamoyl-phosphate synthase, large subunit                                  | 4492 | Nucleotide transport & metabolism                            |
| carbamoyl-phosphate synthase, large subunit                                  | 4492 | Amino acid transport & metabolism                            |
| carbamoyl-phosphate synthase, small subunit                                  | 1084 | Nucleotide transport & metabolism                            |
| carbonate dehydratase                                                        | 620  | Inorganic ion transport & metabolism                         |
| carboxyl transferase domain protein                                          | 310  | Lipid transport & metabolism                                 |
| cell division ATP-binding protein FtsE                                       | 1549 | Cell division                                                |
| cell division protein FtsZ                                                   | 3020 | Cell division                                                |
| cell envelope-like function transcriptional attenuator common domain protein | 387  | Transcription                                                |
| CHAP domain protein                                                          | 1239 | Cell division                                                |
| chaperone protein DnaK                                                       | 154  | Posttranslational modification                               |
| chaperonin GroL                                                              | 1162 | Posttranslational modification                               |
| chaperonin GroS                                                              | 154  | Posttranslational modification                               |
| chorismate synthase                                                          | 155  | Amino acid transport & metabolism                            |
| chromosomal replication initiator protein DnaA                               | 1704 | Replication, recombination, and repair                       |
| Cna protein B-type domain protein                                            | 697  | Cell wall/ membrane                                          |
| co-chaperone GrpE                                                            | 542  | Posttranslational modification                               |
| cobalt ABC transporter, ATP-binding protein                                  | 697  | Inorganic ion transport & metabolism                         |
| CobQ/CobB/MinD/ParA nucleotide binding domain protein                        | 852  | Cell division                                                |
| cold-shock DNA-binding domain protein                                        | 151  | Transcription                                                |
| conserved hypothetical protein, YfiH family                                  | 697  | Secondary metabolites biosynthesis, transport and catabolism |
| coproporphyrinogen dehydrogenase                                             | 310  | Coenzyme transport & metabolism                              |
| CRISPR system CASCADE complex protein CasC                                   | 852  | Replication, recombination, and repair                       |

|                                                                      |       |                                        |
|----------------------------------------------------------------------|-------|----------------------------------------|
| crossover junction endodeoxyribonuclease RuvC                        | 465   | Replication, recombination, and repair |
| CTP synthase                                                         | 5034  | Nucleotide transport & metabolism      |
| cyclomaltodextrinase                                                 | 1471  | Carbohydrate transport & metabolism    |
| cysteine desulfurase, SufS subfamily                                 | 1704  | Amino acid transport & metabolism      |
| cysteine--tRNA ligase                                                | 2091  | Translation                            |
| D-ala D-ala ligase N-terminal domain protein                         | 1936  | Nucleotide transport & metabolism      |
| D-alanyl-D-alanine carboxypeptidase/D-alanyl-D-alanine-endopeptidase | 697   | Cell wall/ membrane                    |
| D-xylulose 5-phosphate/D-fructose 6-phosphate phosphoketolase        | 16264 | Carbohydrate transport & metabolism    |
| dCTP deaminase                                                       | 387   | Nucleotide transport & metabolism      |
| DEAD/DEAH box helicase                                               | 310   | Replication, recombination, and repair |
| DEAD/DEAH box helicase                                               | 697   | Transcription                          |
| DEAD/DEAH box helicase                                               | 697   | Translation                            |
| di-trans,poly-cis-decaprenylcistransferase                           | 465   | Coenzyme transport & metabolism        |
| dihydrodipicolinate synthetase family                                | 542   | Cell wall/ membrane                    |
| dihydrodipicolinate synthetase family                                | 542   | Amino acid transport & metabolism      |
| dihydrofolate reductase                                              | 697   | Coenzyme transport & metabolism        |
| dihydroorotate oxidase                                               | 929   | Nucleotide transport & metabolism      |
| dimethyladenosine transferase                                        | 1007  | Translation                            |
| dipeptidase                                                          | 4569  | Amino acid transport & metabolism      |
| diphosphomevalonate decarboxylase                                    | 774   | Lipid transport & metabolism           |
| divergent AAA domain protein                                         | 155   | Transcription                          |
| DivIVA domain protein                                                | 232   | Defense mechanisms                     |
| DivIVA domain repeat protein                                         | 1162  | Intracellular trafficking              |
| DivIVA domain repeat protein                                         | 1162  | Cell motility                          |
| DNA (cytosine-5-)-methyltransferase                                  | 542   | Replication, recombination, and repair |
| DNA gyrase, A subunit                                                | 2091  | Replication, recombination, and repair |
| DNA gyrase, B subunit                                                | 2866  | Replication, recombination, and repair |
| DNA gyrase, B subunit, C-terminal domain protein                     | 620   | Replication, recombination, and repair |

|                                                  |       |                                        |
|--------------------------------------------------|-------|----------------------------------------|
| DNA gyrase/topoisomerase IV, A subunit           | 155   | Replication, recombination, and repair |
| DNA ligase (NAD <sup>+</sup> )                   | 2633  | Replication, recombination, and repair |
| DNA polymerase III, alpha subunit                | 2943  | Replication, recombination, and repair |
| DNA polymerase III, beta subunit                 | 3795  | Replication, recombination, and repair |
| DNA polymerase III, delta' subunit               | 620   | Replication, recombination, and repair |
| DNA polymerase III, subunit gamma and tau        | 1471  | Replication, recombination, and repair |
| DNA primase                                      | 1704  | Replication, recombination, and repair |
| DNA repair protein RadA                          | 310   | Posttranslational modification         |
| DNA replication and repair protein RecF          | 232   | Replication, recombination, and repair |
| DNA-binding helix-turn-helix protein             | 232   | Transcription                          |
| DNA-binding protein HBI                          | 232   | Replication, recombination, and repair |
| DNA-binding regulatory protein, YebC/PmpR family | 387   | Transcription                          |
| DNA-directed DNA polymerase                      | 1317  | Replication, recombination, and repair |
| DNA-directed RNA polymerase, alpha subunit       | 387   | Transcription                          |
| DNA-directed RNA polymerase, alpha subunit       | 4105  | Transcription                          |
| DNA-directed RNA polymerase, beta subunit        | 852   | Transcription                          |
| DNA-directed RNA polymerase, beta subunit        | 11462 | Transcription                          |
| DNA-directed RNA polymerase, beta' subunit       | 697   | Transcription                          |
| DNA-directed RNA polymerase, beta' subunit       | 697   | Transcription                          |
| DNA-directed RNA polymerase, beta' subunit       | 13786 | Transcription                          |
| DNA-directed RNA polymerase, omega subunit       | 232   | Transcription                          |
| dTDP-glucose 4,6-dehydratase                     | 4182  | Cell wall/ membrane                    |
| dTMP kinase                                      | 465   | Nucleotide transport & metabolism      |
| endopeptidase Clp                                | 310   | Posttranslational modification         |
| excinuclease ABC, B subunit                      | 542   | Replication, recombination, and repair |
| exodeoxyribonuclease VII, large subunit          | 231   | Replication, recombination, and repair |
| exonuclease                                      | 155   | Replication, recombination, and repair |
| Exonuclease VII, large subunit                   | 155   | Replication, recombination, and repair |

|                                                           |      |                                                              |
|-----------------------------------------------------------|------|--------------------------------------------------------------|
| FAD binding domain protein                                | 154  | Energy production & conversion                               |
| FAD dependent oxidoreductase                              | 4105 | Coenzyme transport & metabolism                              |
| FAH family protein                                        | 387  | Secondary metabolites biosynthesis, transport and catabolism |
| FCD domain protein                                        | 387  | Transcription                                                |
| FemAB family protein                                      | 387  | Defense mechanisms                                           |
| FeS assembly ATPase SufC                                  | 2633 | Posttranslational modification                               |
| FeS assembly protein SufB                                 | 2246 | Posttranslational modification                               |
| FeS assembly protein SufD                                 | 1549 | Posttranslational modification                               |
| FHA domain protein                                        | 929  | Signal transduction mechanisms                               |
| formate C-acetyltransferase                               | 387  | Energy production & conversion                               |
| formate C-acetyltransferase                               | 9061 | Energy production & conversion                               |
| fructosamine kinase                                       | 1549 | Carbohydrate transport & metabolism                          |
| fructose-bisphosphate aldolase, class II                  | 1007 | Carbohydrate transport & metabolism                          |
| FtsK/SpoIIIE family protein                               | 387  | Cell division                                                |
| galactokinase                                             | 1704 | Carbohydrate transport & metabolism                          |
| glucosamine-6-phosphate deaminase                         | 1007 | Carbohydrate transport & metabolism                          |
| glucose-1-phosphate thymidyltransferase                   | 1859 | Coenzyme transport & metabolism                              |
| glucose-6-phosphate dehydrogenase                         | 2401 | Carbohydrate transport & metabolism                          |
| glucose-6-phosphate isomerase                             | 387  | Carbohydrate transport & metabolism                          |
| glucose-6-phosphate isomerase                             | 3175 | Carbohydrate transport & metabolism                          |
| glutamate racemase                                        | 1394 | Cell wall/ membrane                                          |
| glutamate--tRNA ligase                                    | 4724 | Translation                                                  |
| glutamate-5-semialdehyde dehydrogenase                    | 1859 | Amino acid transport & metabolism                            |
| glutamine synthetase, type I                              | 697  | Amino acid transport & metabolism                            |
| glutamine-fructose-6-phosphate transaminase (isomerizing) | 3330 | Cell wall/ membrane                                          |
| glyceraldehyde-3-phosphate dehydrogenase, type I          | 6815 | Carbohydrate transport & metabolism                          |
| glycerol-3-phosphate dehydrogenase [NAD(P)+]              | 1471 | Lipid transport & metabolism                                 |

|                                                                                 |      |                                        |
|---------------------------------------------------------------------------------|------|----------------------------------------|
| glycine oxidase ThiO                                                            | 232  | Amino acid transport & metabolism      |
| glycine--tRNA ligase                                                            | 2711 | Translation                            |
| glycogen debranching enzyme GlgX                                                | 2478 | Carbohydrate transport & metabolism    |
| glycosyl hydrolase family 20, catalytic domain protein                          | 542  | Carbohydrate transport & metabolism    |
| glycosyl hydrolase family 25                                                    | 852  | Cell wall/ membrane                    |
| glycosyl hydrolase, family 31                                                   | 1007 | Carbohydrate transport & metabolism    |
| glycosyltransferase, group 1 family protein                                     | 310  | Cell wall/ membrane                    |
| glycosyltransferase, group 2 family protein                                     | 465  | Cell wall/ membrane                    |
| GMP synthase (glutamine-hydrolyzing) domain protein                             | 226  | Nucleotide transport & metabolism      |
| GMP synthase (glutamine-hydrolyzing) domain protein                             | 2866 | Nucleotide transport & metabolism      |
| Gram-positive signal peptide protein, YSIRK family                              | 310  | Cell division                          |
| GTP-binding protein LepA                                                        | 3330 | Cell wall/ membrane                    |
| GTP-binding protein TypA                                                        | 697  | Signal transduction mechanisms         |
| GTP-binding protein TypA                                                        | 6351 | Signal transduction mechanisms         |
| GTP-binding protein YchF                                                        | 542  | Translation                            |
| GTP-binding protein YchF                                                        | 2401 | Translation                            |
| guanosine pentaphosphate synthetase I/polyribonucleotide nucleotidyltransferase | 542  | Translation                            |
| guanosine pentaphosphate synthetase I/polyribonucleotide nucleotidyltransferase | 9294 | Translation                            |
| guanylate kinase                                                                | 155  | Nucleotide transport & metabolism      |
| HAD hydrolase, family IIA                                                       | 1239 | Carbohydrate transport & metabolism    |
| Ham1 family protein                                                             | 929  | Nucleotide transport & metabolism      |
| histidine triad domain protein                                                  | 387  | Carbohydrate transport & metabolism    |
| histidine triad domain protein                                                  | 387  | Nucleotide transport & metabolism      |
| histidine--tRNA ligase                                                          | 3872 | Translation                            |
| Holliday junction DNA helicase RuvA                                             | 155  | Replication, recombination, and repair |
| Holliday junction DNA helicase RuvB                                             | 852  | Replication, recombination, and repair |
| homoserine dehydrogenase                                                        | 1549 | Amino acid transport & metabolism      |
| homoserine kinase                                                               | 308  | Amino acid transport & metabolism      |

|                                                  |      |                                                              |
|--------------------------------------------------|------|--------------------------------------------------------------|
| HTH domain protein                               | 465  | Carbohydrate transport & metabolism                          |
| hydrolase, NUDIX family                          | 232  | Nucleotide transport & metabolism                            |
| hydrolase, NUDIX family                          | 387  | Replication, recombination, and repair                       |
| hydroxymethylglutaryl-CoA reductase, degradative | 310  | Lipid transport & metabolism                                 |
| hydroxymethylglutaryl-CoA synthase               | 1239 | Lipid transport & metabolism                                 |
| hypothetical protein                             | 231  | Signal transduction mechanisms                               |
| hypothetical protein                             | 387  | Posttranslational modification                               |
| hypothetical protein                             | 620  | Carbohydrate transport & metabolism                          |
| hypothetical protein                             | 929  | Secondary metabolites biosynthesis, transport and catabolism |
| hypothetical protein                             | 980  | Cell division                                                |
| hypothetical protein                             | 1007 | Cell wall/ membrane                                          |
| hypothetical protein                             | 1084 | Translation                                                  |
| hypothetical protein                             | 1162 | Inorganic ion transport & metabolism                         |
| hypothetical protein                             | 2091 | Transcription                                                |
| hypothetical protein                             | 3175 | Replication, recombination, and repair                       |
| hypothetical protein                             | 6893 | Lipid transport & metabolism                                 |
| hypoxanthine phosphoribosyltransferase           | 774  | Nucleotide transport & metabolism                            |
| IMP dehydrogenase family protein                 | 465  | Nucleotide transport & metabolism                            |
| inorganic diphosphatase                          | 852  | Energy production & conversion                               |
| inosine-5'-monophosphate dehydrogenase           | 155  | Nucleotide transport & metabolism                            |
| inosine-5'-monophosphate dehydrogenase           | 3330 | Nucleotide transport & metabolism                            |
| Inosine-uridine preferring nucleoside hydrolase  | 929  | Nucleotide transport & metabolism                            |
| iojap-like protein                               | 310  | Translation                                                  |
| isoleucine--tRNA ligase                          | 5034 | Translation                                                  |
| isopentenyl-diphosphate delta-isomerase, type 2  | 1471 | Energy production & conversion                               |
| kinase domain protein                            | 542  | Signal transduction mechanisms                               |
| kinase domain protein                            | 542  | Replication, recombination, and repair                       |

|                                                          |       |                                     |
|----------------------------------------------------------|-------|-------------------------------------|
| kinase domain protein                                    | 542   | Transcription                       |
| kinase, PfkB family                                      | 2091  | Carbohydrate transport & metabolism |
| kojibiose phosphorylase                                  | 387   | Carbohydrate transport & metabolism |
| L-arabinose isomerase                                    | 1317  | Carbohydrate transport & metabolism |
| L-lactate dehydrogenase                                  | 3253  | Energy production & conversion      |
| L-serine ammonia-lyase                                   | 1626  | Amino acid transport & metabolism   |
| lactate/malate dehydrogenase, NAD binding domain protein | 3253  | Energy production & conversion      |
| leucine--tRNA ligase                                     | 8906  | Translation                         |
| low molecular weight phosphotyrosine protein phosphatase | 697   | Signal transduction mechanisms      |
| LPXTG-motif cell wall anchor domain protein              | 155   | Cell wall/ membrane                 |
| lysine--tRNA ligase                                      | 310   | Translation                         |
| lysine--tRNA ligase                                      | 9449  | Translation                         |
| LysR substrate binding domain protein                    | 542   | Transcription                       |
| MaoC-like protein                                        | 10533 | Lipid transport & metabolism        |
| membrane alanyl aminopeptidase                           | 387   | Amino acid transport & metabolism   |
| methionine adenosyltransferase                           | 1704  | Coenzyme transport & metabolism     |
| methionine aminopeptidase, type I                        | 1239  | Amino acid transport & metabolism   |
| methionine--tRNA ligase                                  | 3872  | Translation                         |
| methionyl-tRNA formyltransferase                         | 697   | Translation                         |
| methyltransferase domain protein                         | 852   | Translation                         |
| methyltransferase small domain protein                   | 154   | Translation                         |
| Mur ligase middle domain protein                         | 774   | Cell wall/ membrane                 |
| N-acetylglucosamine-6-phosphate deacetylase              | 1317  | Carbohydrate transport & metabolism |
| N-acylglucosamine 2-epimerase                            | 387   | Carbohydrate transport & metabolism |
| NAD dependent epimerase/dehydratase family protein       | 1704  | Cell wall/ membrane                 |
| NAD dependent epimerase/dehydratase family protein       | 1704  | Carbohydrate transport & metabolism |
| NAD(+)/NADH kinase                                       | 387   | Coenzyme transport & metabolism     |
| NAD+ synthase                                            | 852   | Coenzyme transport & metabolism     |



|                                                                    |      |                                                              |
|--------------------------------------------------------------------|------|--------------------------------------------------------------|
| NADH oxidase                                                       | 4492 | Energy production & conversion                               |
| nicotinate phosphoribosyltransferase                               | 310  | Nucleotide transport & metabolism                            |
| nitroreductase family protein                                      | 542  | Energy production & conversion                               |
| NLPA lipoprotein                                                   | 620  | Inorganic ion transport & metabolism                         |
| NlpC/P60 family protein                                            | 1007 | Cell wall/ membrane                                          |
| NMT1/THI5-like protein                                             | 1704 | Inorganic ion transport & metabolism                         |
| Obg family GTPase CgtA                                             | 151  | Transcription                                                |
| orotate phosphoribosyltransferase                                  | 1471 | Nucleotide transport & metabolism                            |
| orotidine 5'-phosphate decarboxylase                               | 774  | Nucleotide transport & metabolism                            |
| oxidoreductase NAD-binding domain protein                          | 929  | Energy production & conversion                               |
| oxidoreductase, aldo/keto reductase family protein                 | 1549 | Energy production & conversion                               |
| oxidoreductase, short chain dehydrogenase/reductase family protein | 620  | Secondary metabolites biosynthesis, transport and catabolism |
| oxidoreductase, short chain dehydrogenase/reductase family protein | 620  | Lipid transport & metabolism                                 |
| pantothenate kinase                                                | 310  | Coenzyme transport & metabolism                              |
| ParB-like protein                                                  | 387  | Transcription                                                |
| penicillin-binding protein A                                       | 232  | Cell wall/ membrane                                          |
| penicillin-binding protein dimerization domain protein             | 465  | Cell wall/ membrane                                          |
| penicillin-binding protein, transpeptidase domain protein          | 1084 | Cell wall/ membrane                                          |
| peptidase C1-like family                                           | 1239 | Amino acid transport & metabolism                            |
| peptidase dimerization domain protein                              | 155  | Amino acid transport & metabolism                            |
| peptidase family M13                                               | 852  | Posttranslational modification                               |
| peptide chain release factor 1                                     | 226  | Translation                                                  |
| peptide chain release factor 2                                     | 542  | Translation                                                  |
| peptide deformylase                                                | 542  | Translation                                                  |
| peptidyl-prolyl cis-trans isomerase, cyclophilin-type              | 697  | Carbohydrate transport & metabolism                          |
| peptidyl-prolyl cis-trans isomerase, FKBP-type                     | 1239 | Cell wall/ membrane                                          |
| phenylalanine--tRNA ligase, alpha subunit                          | 542  | Translation                                                  |

|                                                           |       |                                      |
|-----------------------------------------------------------|-------|--------------------------------------|
| phenylalanine--tRNA ligase, beta subunit                  | 3175  | Translation                          |
| phenylalanyl-tRNA synthetase, beta subunit                | 310   | Translation                          |
| PhoH family protein                                       | 310   | Signal transduction mechanisms       |
| phosphate ABC transporter, ATP-binding protein            | 697   | Inorganic ion transport & metabolism |
| phosphate ABC transporter, phosphate-binding protein PstS | 542   | Inorganic ion transport & metabolism |
| phosphate acetyltransferase                               | 465   | Energy production & conversion       |
| phosphate transport system regulatory protein PhoU        | 1549  | Inorganic ion transport & metabolism |
| phosphoenolpyruvate carboxykinase (GTP)                   | 4337  | Coenzyme transport & metabolism      |
| phosphoglucomutase, alpha-D-glucose phosphate-specific    | 9681  | Carbohydrate transport & metabolism  |
| phosphogluconate dehydrogenase (decarboxylating)          | 852   | Coenzyme transport & metabolism      |
| phosphogluconate dehydrogenase (decarboxylating)          | 1549  | Carbohydrate transport & metabolism  |
| phosphoglucosamine mutase                                 | 3408  | Carbohydrate transport & metabolism  |
| phosphoglycerate kinase                                   | 774   | Nucleotide transport & metabolism    |
| phosphoglycerate mutase 1 family                          | 5189  | Carbohydrate transport & metabolism  |
| phosphoglycerate mutase family protein                    | 1007  | Carbohydrate transport & metabolism  |
| phosphomethylpyrimidine kinase                            | 155   | Transcription                        |
| phosphomethylpyrimidine kinase                            | 155   | Coenzyme transport & metabolism      |
| phosphopyruvate hydratase                                 | 8597  | Carbohydrate transport & metabolism  |
| phosphoribosylamine--glycine ligase                       | 542   | Nucleotide transport & metabolism    |
| phosphoribosylaminoimidazole carboxylase, ATPase subunit  | 2169  | Nucleotide transport & metabolism    |
| phosphoribosylaminoimidazolesuccinocarboxamide synthase   | 1626  | Nucleotide transport & metabolism    |
| phosphoribosylformylglycinamide cyclo-ligase              | 1394  | Nucleotide transport & metabolism    |
| phosphoribosylformylglycinamide synthase                  | 5809  | Nucleotide transport & metabolism    |
| phosphorylase, glycogen/starch/alpha-glucan family        | 11152 | Carbohydrate transport & metabolism  |
| phosphorylase, Pnp/Udp family                             | 542   | Nucleotide transport & metabolism    |
| polyphosphate kinase 1                                    | 4492  | Inorganic ion transport & metabolism |
| polyprenyl synthetase                                     | 697   | Coenzyme transport & metabolism      |
| POTRA domain protein, FtsQ-type                           | 155   | Cell division                        |

|                                                                                  |      |                                        |
|----------------------------------------------------------------------------------|------|----------------------------------------|
| Ppx/GppA phosphatase family protein                                              | 2556 | Inorganic ion transport & metabolism   |
| Ppx/GppA phosphatase family protein                                              | 2556 | Nucleotide transport & metabolism      |
| prephenate dehydratase                                                           | 232  | Amino acid transport & metabolism      |
| prephenate dehydrogenase                                                         | 232  | Amino acid transport & metabolism      |
| preprotein translocase, SecA subunit                                             | 6738 | Intracellular trafficking              |
| preprotein translocase, YajC subunit                                             | 231  | Intracellular trafficking              |
| proline--tRNA ligase                                                             | 774  | Translation                            |
| prolipoprotein diacylglycerol transferase                                        | 232  | Cell wall/ membrane                    |
| protein phosphatase 2C                                                           | 232  | Signal transduction mechanisms         |
| protein-(glutamine-N5) methyltransferase, release factor-specific                | 465  | Translation                            |
| pseudouridine synthase, RluA family                                              | 232  | Translation                            |
| pseudouridylate synthase                                                         | 232  | Translation                            |
| pullulanase, type I                                                              | 852  | Carbohydrate transport & metabolism    |
| putative 5-methyltetrahydropteroyltriglutamate--homocysteine S-methyltransferase | 310  | Amino acid transport & metabolism      |
| putative 6-phospho 3-hexuloisomerase                                             | 154  | Cell wall/ membrane                    |
| putative adenylosuccinate lyase                                                  | 1626 | Nucleotide transport & metabolism      |
| putative ATP-dependent DNA helicase PcrA                                         | 852  | Replication, recombination, and repair |
| putative ATP-dependent DNA helicase RecG                                         | 929  | Replication, recombination, and repair |
| putative chaperone protein DnaJ                                                  | 1162 | Posttranslational modification         |
| putative CRISPR system CASCADE complex protein CasA                              | 1162 | Replication, recombination, and repair |
| putative dGTPase                                                                 | 387  | Nucleotide transport & metabolism      |
| putative dihydrodipicolinate synthase                                            | 542  | Cell wall/ membrane                    |
| putative dihydrodipicolinate synthase                                            | 542  | Amino acid transport & metabolism      |
| putative dihydroorotate oxidase                                                  | 774  | Nucleotide transport & metabolism      |
| putative DNA polymerase III, delta subunit                                       | 465  | Replication, recombination, and repair |
| putative DNA repair protein RecN                                                 | 774  | Replication, recombination, and repair |
| putative dTDP-4-dehydrorhamnose reductase                                        | 1317 | Cell wall/ membrane                    |
| putative eukaryotic phosphomannomutase                                           | 542  | Signal transduction mechanisms         |

|                                                                                          |       |                                        |
|------------------------------------------------------------------------------------------|-------|----------------------------------------|
| putative exodeoxyribonuclease III                                                        | 1084  | Replication, recombination, and repair |
| putative formate--tetrahydrofolate ligase                                                | 6893  | Nucleotide transport & metabolism      |
| putative glutamyl-queuosine tRNA(Asp) synthetase                                         | 1007  | Translation                            |
| putative glycoprotease GCP                                                               | 1162  | Posttranslational modification         |
| putative histidinol-phosphate transaminase                                               | 1162  | Amino acid transport & metabolism      |
| putative inositol 1-phosphate synthase                                                   | 1626  | Lipid transport & metabolism           |
| putative opcA protein                                                                    | 1317  | Carbohydrate transport & metabolism    |
| putative phosphonate C-P lyase system protein PhnK                                       | 697   | Amino acid transport & metabolism      |
| putative phosphonate C-P lyase system protein PhnK                                       | 2401  | Inorganic ion transport & metabolism   |
| putative phosphoribosylaminoimidazolecarboxamide formyltransferase/IMP cyclohydrolase    | 620   | Nucleotide transport & metabolism      |
| putative phosphoribosylglycinamide formyltransferase 2                                   | 1007  | Nucleotide transport & metabolism      |
| putative pyroglutamyl-peptidase I                                                        | 542   | Posttranslational modification         |
| putative ribokinase                                                                      | 852   | Coenzyme transport & metabolism        |
| putative RNA methyltransferase, TrmH family, group 2                                     | 1394  | Translation                            |
| putative serine O-acetyltransferase                                                      | 310   | Amino acid transport & metabolism      |
| putative undecaprenyldiphospho-muramoylpentapeptide beta-N-acetylglucosaminyltransferase | 387   | Cell wall/ membrane                    |
| putative YjeF domain protein                                                             | 620   | Coenzyme transport & metabolism        |
| pyridine nucleotide-disulfide oxidoreductase                                             | 1859  | Energy production & conversion         |
| pyridoxal 5'-phosphate synthase, glutaminase subunit Pdx2                                | 1626  | Coenzyme transport & metabolism        |
| pyridoxal 5'-phosphate synthase, synthase subunit Pdx1                                   | 465   | Coenzyme transport & metabolism        |
| pyrroline-5-carboxylate reductase                                                        | 465   | Amino acid transport & metabolism      |
| pyruvate formate-lyase 1-activating enzyme                                               | 1162  | Energy production & conversion         |
| pyruvate kinase                                                                          | 17193 | Carbohydrate transport & metabolism    |
| RecA protein                                                                             | 2711  | Replication, recombination, and repair |
| recombination factor protein RarA                                                        | 774   | Replication, recombination, and repair |
| recombination protein RecR                                                               | 310   | Replication, recombination, and repair |
| RelA/SpoT family protein                                                                 | 2246  | Signal transduction mechanisms         |

|                                                     |      |                                        |
|-----------------------------------------------------|------|----------------------------------------|
| RelA/SpoT family protein                            | 2246 | Transcription                          |
| repeat protein                                      | 2943 | Intracellular trafficking              |
| repeat protein                                      | 2943 | Cell motility                          |
| replicative DNA helicase                            | 1084 | Replication, recombination, and repair |
| repressor LexA                                      | 232  | Transcription                          |
| response regulator receiver domain protein          | 155  | Transcription                          |
| response regulator receiver domain protein          | 774  | Signal transduction mechanisms         |
| rhamnan synthesis protein F                         | 1162 | Cell wall/ membrane                    |
| riboflavin kinase                                   | 1394 | Coenzyme transport & metabolism        |
| ribonuclease HII                                    | 465  | Replication, recombination, and repair |
| ribonuclease III                                    | 155  | Translation                            |
| ribonuclease, Rne/Rng family                        | 2556 | Translation                            |
| ribonucleoside-diphosphate reductase, alpha subunit | 232  | Nucleotide transport & metabolism      |
| ribonucleoside-diphosphate reductase, alpha subunit | 3175 | Nucleotide transport & metabolism      |
| ribonucleoside-diphosphate reductase, beta subunit  | 3717 | Nucleotide transport & metabolism      |
| ribose 5-phosphate isomerase A                      | 2788 | Carbohydrate transport & metabolism    |
| ribose-phosphate diphosphokinase                    | 1471 | Nucleotide transport & metabolism      |
| ribosomal protein L1                                | 2091 | Translation                            |
| ribosomal protein L10                               | 1471 | Translation                            |
| ribosomal protein L11                               | 465  | Translation                            |
| ribosomal protein L13                               | 620  | Translation                            |
| ribosomal protein L14                               | 387  | Translation                            |
| ribosomal protein L15                               | 310  | Translation                            |
| ribosomal protein L16                               | 697  | Translation                            |
| ribosomal protein L17                               | 310  | Translation                            |
| ribosomal protein L18                               | 231  | Translation                            |
| ribosomal protein L19                               | 620  | Translation                            |
| ribosomal protein L2                                | 310  | Translation                            |

|                                                 |      |                                     |
|-------------------------------------------------|------|-------------------------------------|
| ribosomal protein L20                           | 232  | Translation                         |
| ribosomal protein L21                           | 310  | Translation                         |
| ribosomal protein L22                           | 310  | Translation                         |
| ribosomal protein L23                           | 310  | Translation                         |
| ribosomal protein L24                           | 232  | Translation                         |
| ribosomal protein L25, Ctc-form                 | 1239 | Translation                         |
| ribosomal protein L28                           | 155  | Translation                         |
| ribosomal protein L31                           | 231  | Translation                         |
| ribosomal protein L5                            | 1704 | Translation                         |
| ribosomal protein L6                            | 620  | Translation                         |
| ribosomal protein L7/L12                        | 697  | Translation                         |
| ribosomal protein L9                            | 465  | Translation                         |
| ribosomal protein S10                           | 852  | Translation                         |
| ribosomal protein S15                           | 310  | Translation                         |
| ribosomal protein S16                           | 465  | Translation                         |
| ribosomal protein S2                            | 3485 | Translation                         |
| ribosomal protein S3                            | 852  | Translation                         |
| ribosomal protein S4                            | 929  | Translation                         |
| ribosomal protein S5                            | 2169 | Translation                         |
| ribosomal protein S6                            | 387  | Translation                         |
| ribosomal protein S7                            | 620  | Translation                         |
| ribosomal protein S8                            | 1317 | Translation                         |
| ribosomal protein S9                            | 155  | Translation                         |
| ribosomal RNA large subunit methyltransferase J | 155  | Translation                         |
| ribosomal subunit interface protein             | 620  | Translation                         |
| ribosomal-protein-alanine acetyltransferase     | 155  | Transcription                       |
| ribosome biogenesis GTPase Der                  | 3253 | Nucleotide transport & metabolism   |
| ribulose-phosphate 3-epimerase                  | 232  | Carbohydrate transport & metabolism |

|                                                                              |      |                                        |
|------------------------------------------------------------------------------|------|----------------------------------------|
| RNA methyltransferase                                                        | 774  | Translation                            |
| RNA methyltransferase, TrmH family                                           | 929  | Translation                            |
| RNA methyltransferase, TrmH family, group 3                                  | 1239 | Translation                            |
| RNA polymerase sigma factor RpoD                                             | 1007 | Transcription                          |
| RNA polymerase sigma factor RpoD                                             | 3020 | Transcription                          |
| ROK family protein                                                           | 3330 | Transcription                          |
| ROK family protein                                                           | 3330 | Carbohydrate transport & metabolism    |
| S-adenosyl-L-homocysteine hydrolase, NAD binding domain protein              | 1781 | Coenzyme transport & metabolism        |
| S-adenosyl-methyltransferase MraW                                            | 1471 | Translation                            |
| S-adenosylmethionine-dependent methyltransferase, YraL family                | 852  | Coenzyme transport & metabolism        |
| S-ribosylhomocysteinase LuxS                                                 | 542  | Coenzyme transport & metabolism        |
| septum formation protein Maf                                                 | 697  | Nucleotide transport & metabolism      |
| septum formation protein Maf                                                 | 697  | Cell division                          |
| serine--tRNA ligase                                                          | 6041 | Translation                            |
| signal recognition particle protein                                          | 2401 | Intracellular trafficking              |
| signal recognition particle-docking protein FtsY                             | 310  | Intracellular trafficking              |
| single-strand binding family protein                                         | 155  | Replication, recombination, and repair |
| sortase family protein                                                       | 1162 | Cell wall/ membrane                    |
| Sua5/YciO/YrdC/YwlC family protein                                           | 620  | Translation                            |
| SUF system FeS assembly protein, NifU family                                 | 232  | Energy production & conversion         |
| sugar-binding domain protein                                                 | 310  | Carbohydrate transport & metabolism    |
| sugar-binding domain protein                                                 | 774  | Transcription                          |
| tetrahydrofolate dehydrogenase/cyclohydrolase, NAD(P)-binding domain protein | 1394 | Nucleotide transport & metabolism      |
| thiamine pyrophosphate enzyme, N-terminal TPP binding domain protein         | 2556 | Coenzyme transport & metabolism        |
| thiazole biosynthesis protein ThiG                                           | 155  | Coenzyme transport & metabolism        |
| Thiol-activated cytolysin                                                    | 3330 | Cell wall/ membrane                    |
| thioredoxin                                                                  | 155  | Posttranslational modification         |
| threonine synthase                                                           | 2633 | Amino acid transport & metabolism      |

|                                                               |       |                                        |
|---------------------------------------------------------------|-------|----------------------------------------|
| threonine--tRNA ligase                                        | 697   | Translation                            |
| threonine--tRNA ligase                                        | 5034  | Translation                            |
| thymidylate synthase                                          | 1162  | Nucleotide transport & metabolism      |
| TIM-barrel protein, nifR3 family                              | 1239  | Translation                            |
| TRAM domain protein                                           | 929   | Translation                            |
| transaldolase                                                 | 1084  | Coenzyme transport & metabolism        |
| transcription antitermination factor NusB                     | 310   | Transcription                          |
| transcription termination factor NusA                         | 1162  | Transcription                          |
| transcription termination factor Rho                          | 310   | Transcription                          |
| transcription termination factor Rho                          | 1704  | Transcription                          |
| transcription termination/antitermination factor NusG         | 310   | Transcription                          |
| transcription-repair coupling factor                          | 697   | Replication, recombination, and repair |
| transcriptional regulator NrdR                                | 542   | Transcription                          |
| transcriptional regulator, AsnC family                        | 542   | Transcription                          |
| transcriptional regulator, DeoR family                        | 774   | Transcription                          |
| transcriptional regulator, Fur family                         | 232   | Inorganic ion transport & metabolism   |
| transcriptional regulator, GntR family                        | 697   | Transcription                          |
| transcriptional regulator, LacI family                        | 232   | Transcription                          |
| transcriptional regulator, LuxR family                        | 232   | Transcription                          |
| transcriptional regulator, LysR family                        | 155   | Transcription                          |
| transcriptional regulator, MerR family                        | 154   | Transcription                          |
| transcriptional regulator, Sir2 family                        | 465   | Transcription                          |
| transcriptional regulatory protein, C-terminal domain protein | 232   | Signal transduction mechanisms         |
| transcriptional regulatory protein, C-terminal domain protein | 232   | Transcription                          |
| transglycosylase                                              | 2866  | Cell wall/ membrane                    |
| transketolase                                                 | 18510 | Coenzyme transport & metabolism        |
| translation elongation factor G                               | 465   | Translation                            |
| translation elongation factor G                               | 12159 | Translation                            |



|                                                             |       |                                      |
|-------------------------------------------------------------|-------|--------------------------------------|
| translation elongation factor Ts                            | 155   | Translation                          |
| translation elongation factor Tu                            | 2866  | Translation                          |
| translation elongation factor Tu                            | 47165 | Translation                          |
| translation initiation factor IF-2                          | 3098  | Translation                          |
| translation initiation factor IF-3                          | 155   | Translation                          |
| transporter, major facilitator family protein               | 155   | Inorganic ion transport & metabolism |
| transporter, major facilitator family protein               | 155   | Carbohydrate transport & metabolism  |
| transporter, major facilitator family protein               | 155   | Amino acid transport & metabolism    |
| transporter, major intrinsic protein (MIP) family protein   | 232   | Intracellular trafficking            |
| trigger factor                                              | 5499  | Cell division                        |
| triose-phosphate isomerase                                  | 387   | Carbohydrate transport & metabolism  |
| tRNA (guanine-N(1)-)-methyltransferase                      | 929   | Translation                          |
| tRNA (guanine-N(7)-)-methyltransferase                      | 231   | Translation                          |
| tRNA adenylyltransferase                                    | 231   | Translation                          |
| tRNA adenylyltransferase                                    | 2711  | Translation                          |
| tRNA nucleotidyltransferase                                 | 155   | Translation                          |
| tRNA pseudouridine synthase A                               | 155   | Translation                          |
| tRNA pseudouridine synthase B                               | 232   | Translation                          |
| tRNA-guanine transglycosylase                               | 1936  | Nucleotide transport & metabolism    |
| trypsin                                                     | 154   | Posttranslational modification       |
| tryptophan--tRNA ligase                                     | 4260  | Translation                          |
| tyrosine--tRNA ligase                                       | 4260  | Translation                          |
| UDP-galactopyranose mutase                                  | 1394  | Cell wall/ membrane                  |
| UDP-glucose 4-epimerase                                     | 2478  | Cell wall/ membrane                  |
| UDP-N-acetylglucosamine 1-carboxyvinyltransferase           | 1162  | Cell wall/ membrane                  |
| UDP-N-acetylmuramate--L-alanine ligase                      | 465   | Cell wall/ membrane                  |
| UDP-N-acetylmuramoyl-L-alanine--D-glutamate ligase          | 774   | Cell wall/ membrane                  |
| UDP-N-acetylmuramoyl-tripeptide--D-alanyl-D- alanine ligase | 1239  | Cell wall/ membrane                  |

|                                              |      |                                        |
|----------------------------------------------|------|----------------------------------------|
| UMP kinase                                   | 1781 | Nucleotide transport & metabolism      |
| universal bacterial protein YeaZ             | 387  | Posttranslational modification         |
| universal stress family protein              | 542  | Signal transduction mechanisms         |
| uracil phosphoribosyltransferase             | 4414 | Nucleotide transport & metabolism      |
| uracil-DNA glycosylase                       | 697  | Replication, recombination, and repair |
| UTP--glucose-1-phosphate uridylyltransferase | 308  | Carbohydrate transport & metabolism    |
| UTP--hexose-1-phosphate uridylyltransferase  | 852  | Energy production & conversion         |
| UvrD/REP helicase                            | 1549 | Replication, recombination, and repair |
| valine--tRNA ligase                          | 7048 | Translation                            |
| xanthine phosphoribosyltransferase           | 465  | Nucleotide transport & metabolism      |
| YceG family protein                          | 154  | Translation                            |

Supplemental Table 3. List of proteins, their abundance, and their associated functional pathway identified in *L. crispatus* bEVs.

| <b>Protein Name</b>                                  | <b>Abundance (ppm)</b> | <b>Functional pathway</b>            |
|------------------------------------------------------|------------------------|--------------------------------------|
| [citrate (pro-3S)-lyase] ligase                      | 704                    | Coenzyme transport & metabolism      |
| 1-phosphofructokinase                                | 1816                   | Coenzyme transport & metabolism      |
| 16S rRNA methyltransferase GidB                      | 1089                   | Translation                          |
| 23S rRNA (uracil-5-)-methyltransferase RumA          | 1759                   | Translation                          |
| 30S ribosomal protein S13                            | 726                    | Translation                          |
| 30S ribosomal protein S4                             | 1816                   | Translation                          |
| 4-phosphoerythronate dehydrogenase                   | 3268                   | Coenzyme transport & metabolism      |
| 4-phosphoerythronate dehydrogenase                   | 3268                   | Energy production & conversion       |
| 5'-nucleotidase, C-terminal domain protein           | 1816                   | Nucleotide transport & metabolism    |
| 5'-nucleotidase, C-terminal domain protein           | 2179                   | Nucleotide transport & metabolism    |
| 50S ribosomal protein L19                            | 726                    | Translation                          |
| 50S ribosomal protein L3                             | 1089                   | Translation                          |
| 50S ribosomal protein L4                             | 1089                   | Translation                          |
| 6-phosphofructokinase                                | 2905                   | Nucleotide transport & metabolism    |
| 6-phosphogluconate dehydrogenase, decarboxylating    | 726                    | Coenzyme transport & metabolism      |
| ABC transporter glutamine-binding protein GlnH       | 1056                   | Signal transduction mechanisms       |
| ABC transporter glutamine-binding protein GlnH       | 1056                   | Amino acid transport & metabolism    |
| ABC transporter, solute-binding protein              | 1089                   | Carbohydrate transport & metabolism  |
| ABC transporter, solute-binding protein              | 4720                   | Carbohydrate transport & metabolism  |
| ABC transporter, substrate-binding protein           | 2542                   | Inorganic ion transport & metabolism |
| ABC transporter, substrate-binding protein, family 5 | 726                    | Amino acid transport & metabolism    |
| ABC transporter, substrate-binding protein, family 5 | 1089                   | Amino acid transport & metabolism    |
| ABC transporter, substrate-binding protein, family 5 | 1089                   | Amino acid transport & metabolism    |
| acetyl-CoA C-acetyltransferase                       | 2179                   | Lipid transport & metabolism         |

|                                                                 |      |                                                              |
|-----------------------------------------------------------------|------|--------------------------------------------------------------|
| acyl carrier protein                                            | 726  | Secondary metabolites biosynthesis, transport and catabolism |
| acyl carrier protein                                            | 726  | Lipid transport & metabolism                                 |
| Acyl-ACP thioesterase                                           | 726  | Lipid transport & metabolism                                 |
| adenine phosphoribosyltransferase                               | 2905 | Nucleotide transport & metabolism                            |
| adenylate kinase                                                | 726  | Nucleotide transport & metabolism                            |
| adenylosuccinate synthase                                       | 3268 | Nucleotide transport & metabolism                            |
| alanine racemase                                                | 2542 | Amino acid transport & metabolism                            |
| alanine--tRNA ligase                                            | 5447 | Translation                                                  |
| aldehyde dehydrogenase (NAD) family protein                     | 5810 | Energy production & conversion                               |
| aldose 1-epimerase                                              | 2179 | Carbohydrate transport & metabolism                          |
| aminopeptidase E                                                | 1816 | Amino acid transport & metabolism                            |
| aminopeptidase N                                                | 2542 | Amino acid transport & metabolism                            |
| aminotransferase, class V                                       | 726  | Amino acid transport & metabolism                            |
| aromatic amino acid aminotransferase                            | 6173 | Amino acid transport & metabolism                            |
| aspartate racemase                                              | 1056 | Cell wall/ membrane                                          |
| aspartate--tRNA ligase                                          | 1089 | Translation                                                  |
| ATP synthase F1, alpha subunit                                  | 726  | Energy production & conversion                               |
| ATP synthase F1, beta subunit                                   | 1089 | Energy production & conversion                               |
| ATP-dependent Clp endopeptidase, proteolytic subunit ClpP       | 2905 | Posttranslational modification                               |
| ATP-dependent protease HslVU, peptidase subunit                 | 2179 | Posttranslational modification                               |
| ATPase family associated with various cellular activities (AAA) | 704  | Posttranslational modification                               |
| ATPase family associated with various cellular activities (AAA) | 2542 | Posttranslational modification                               |
| BadF/BadG/BcrA/BcrD ATPase family protein                       | 726  | Carbohydrate transport & metabolism                          |
| cadmium-exporting ATPase                                        | 726  | Inorganic ion transport & metabolism                         |
| cell division protein FtsA                                      | 2905 | Cell division                                                |
| cell division protein FtsZ                                      | 726  | Cell division                                                |
| cell shape determining protein, MreB/Mrl family                 | 1089 | Cell division                                                |

|                                                               |       |                                        |
|---------------------------------------------------------------|-------|----------------------------------------|
| chaperone protein DnaK                                        | 5810  | Posttranslational modification         |
| chaperonin GroL                                               | 1089  | Posttranslational modification         |
| citrate lyase, alpha subunit                                  | 704   | Coenzyme transport & metabolism        |
| citrate lyase, beta subunit                                   | 1089  | Carbohydrate transport & metabolism    |
| Creatinase                                                    | 5810  | Amino acid transport & metabolism      |
| cysteine--tRNA ligase                                         | 1816  | Translation                            |
| cysteine--tRNA ligase                                         | 2542  | Translation                            |
| D-ala D-ala ligase N-terminal domain protein                  | 2179  | Nucleotide transport & metabolism      |
| D-alanine--poly(phosphoribitol) ligase, subunit 1             | 726   | Coenzyme transport & metabolism        |
| D-alanine--poly(phosphoribitol) ligase, subunit 2             | 726   | Translation                            |
| D-lactate dehydrogenase                                       | 8351  | Energy production & conversion         |
| D-xylulose 5-phosphate/D-fructose 6-phosphate phosphoketolase | 9441  | Carbohydrate transport & metabolism    |
| D-xylulose 5-phosphate/D-fructose 6-phosphate phosphoketolase | 16703 | Carbohydrate transport & metabolism    |
| D-xylulose 5-phosphate/D-fructose 6-phosphate phosphoketolase | 17429 | Carbohydrate transport & metabolism    |
| deoxyadenosine kinase                                         | 726   | Nucleotide transport & metabolism      |
| DHHA2 domain protein                                          | 3994  | Energy production & conversion         |
| dihydrofolate reductase                                       | 652   | Coenzyme transport & metabolism        |
| dipeptidase PepV                                              | 1452  | Amino acid transport & metabolism      |
| dipeptidase PepV                                              | 1452  | Amino acid transport & metabolism      |
| DNA polymerase III, beta subunit                              | 3268  | Replication, recombination, and repair |
| DNA-directed RNA polymerase subunit beta                      | 1089  | Transcription                          |
| DNA-directed RNA polymerase, alpha subunit                    | 2542  | Transcription                          |
| DNA-directed RNA polymerase, alpha subunit                    | 3268  | Transcription                          |
| DNA-directed RNA polymerase, beta subunit                     | 726   | Transcription                          |
| dTMP kinase                                                   | 1452  | Nucleotide transport & metabolism      |
| elongation factor 4                                           | 1452  | Cell wall/ membrane                    |
| exonuclease, DNA polymerase III, epsilon subunit family       | 2542  | Replication, recombination, and repair |
| fatty acid/phospholipid synthesis protein PlsX                | 3994  | Lipid transport & metabolism           |

|                                                           |       |                                        |
|-----------------------------------------------------------|-------|----------------------------------------|
| formate--tetrahydrofolate ligase                          | 1816  | Nucleotide transport & metabolism      |
| fructose-bisphosphate aldolase class-II                   | 2905  | Carbohydrate transport & metabolism    |
| gametolysin                                               | 726   | Cell wall/ membrane                    |
| glucan 1,6-alpha-glucosidase                              | 1452  | Carbohydrate transport & metabolism    |
| glucosamine-6-phosphate deaminase                         | 1452  | Carbohydrate transport & metabolism    |
| glutamate--tRNA ligase                                    | 1629  | Translation                            |
| glutamine synthetase, type I                              | 2905  | Amino acid transport & metabolism      |
| glutamine-fructose-6-phosphate transaminase (isomerizing) | 3994  | Cell wall/ membrane                    |
| glyceraldehyde-3-phosphate dehydrogenase, type I          | 5084  | Carbohydrate transport & metabolism    |
| glycerol kinase                                           | 652   | Nucleotide transport & metabolism      |
| glycerol-3-phosphate cytidyltransferase                   | 726   | Cell wall/ membrane                    |
| glycerol-3-phosphate cytidyltransferase                   | 726   | Lipid transport & metabolism           |
| glycine hydroxymethyltransferase                          | 652   | Amino acid transport & metabolism      |
| glycine hydroxymethyltransferase                          | 978   | Amino acid transport & metabolism      |
| glycine--tRNA ligase, alpha subunit                       | 2542  | Translation                            |
| glycine--tRNA ligase, beta subunit                        | 8715  | Translation                            |
| glycosyl hydrolase family 25                              | 1816  | Cell wall/ membrane                    |
| glycosyl hydrolase, family 1                              | 704   | Carbohydrate transport & metabolism    |
| Gram-positive signal peptide protein, YSIRK family        | 1089  | Cell division                          |
| Gram-positive signal peptide protein, YSIRK family        | 1452  | Cell wall/ membrane                    |
| GTP-binding protein TypA                                  | 10530 | Signal transduction mechanisms         |
| GTP-binding protein YchF                                  | 7262  | Translation                            |
| histidine triad domain protein                            | 2905  | Carbohydrate transport & metabolism    |
| histidine triad domain protein                            | 2905  | Nucleotide transport & metabolism      |
| histidine--tRNA ligase                                    | 11619 | Translation                            |
| homoserine dehydrogenase                                  | 1759  | Amino acid transport & metabolism      |
| hydrolase, NUDIX family                                   | 1452  | Replication, recombination, and repair |
| hydroxymethylglutaryl-CoA synthase                        | 1452  | Lipid transport & metabolism           |

|                                                                                 |       |                                        |
|---------------------------------------------------------------------------------|-------|----------------------------------------|
| hydroxymethylglutaryl-CoA synthase                                              | 1452  | Lipid transport & metabolism           |
| hypothetical protein                                                            | 726   | Carbohydrate transport & metabolism    |
| hypothetical protein                                                            | 1089  | Transcription                          |
| hypothetical protein                                                            | 1089  | Carbohydrate transport & metabolism    |
| hypothetical protein                                                            | 1759  | Nucleotide transport & metabolism      |
| hypothetical protein                                                            | 1955  | Replication, recombination, and repair |
| hypothetical protein                                                            | 2179  | Translation                            |
| hypothetical protein                                                            | 3631  | Lipid transport & metabolism           |
| hypothetical protein                                                            | 7625  | Amino acid transport & metabolism      |
| hypothetical protein                                                            | 7988  | Amino acid transport & metabolism      |
| hypoxanthine phosphoribosyltransferase                                          | 1452  | Nucleotide transport & metabolism      |
| iojap-like protein                                                              | 726   | Translation                            |
| isoleucine--tRNA ligase                                                         | 16340 | Translation                            |
| L-lactate dehydrogenase                                                         | 5084  | Energy production & conversion         |
| leucine--tRNA ligase                                                            | 9078  | Translation                            |
| lipid kinase, YegS/Rv2252/BmrU family                                           | 1452  | Carbohydrate transport & metabolism    |
| lipid kinase, YegS/Rv2252/BmrU family                                           | 1452  | Carbohydrate transport & metabolism    |
| low molecular weight phosphotyrosine protein phosphatase                        | 1452  | Signal transduction mechanisms         |
| lysine--tRNA ligase                                                             | 7625  | Translation                            |
| lysine--tRNA ligase                                                             | 10893 | Translation                            |
| M42 glutamyl aminopeptidase                                                     | 704   | Amino acid transport & metabolism      |
| membrane alanyl aminopeptidase                                                  | 3268  | Amino acid transport & metabolism      |
| methionine adenosyltransferase                                                  | 1452  | Coenzyme transport & metabolism        |
| methionine aminopeptidase, type I                                               | 3268  | Amino acid transport & metabolism      |
| methionine aminopeptidase, type I                                               | 3268  | Amino acid transport & metabolism      |
| methionine--tRNA ligase                                                         | 2542  | Translation                            |
| methionyl-tRNA formyltransferase                                                | 978   | Translation                            |
| methylenetetrahydrofolate dehydrogenase/methenyltetrahydrofolate cyclohydrolase | 2542  | Nucleotide transport & metabolism      |

|                                                                              |       |                                      |
|------------------------------------------------------------------------------|-------|--------------------------------------|
| methylenetetrahydrofolate-tRNA-(uracil-5-)- methyltransferase TrmFO          | 1816  | Translation                          |
| MTA/SAH nucleosidase                                                         | 2179  | Amino acid transport & metabolism    |
| Mur ligase middle domain protein                                             | 726   | Cell wall/ membrane                  |
| nitroreductase family protein                                                | 1452  | Energy production & conversion       |
| NlpC/P60 family protein                                                      | 1452  | Cell wall/ membrane                  |
| nrdI protein                                                                 | 1452  | Nucleotide transport & metabolism    |
| oligoendopeptidase F                                                         | 1452  | Amino acid transport & metabolism    |
| oligoendopeptidase F                                                         | 2905  | Amino acid transport & metabolism    |
| orotidine 5'-phosphate decarboxylase/HUMPS family                            | 2905  | Carbohydrate transport & metabolism  |
| oxidoreductase, aldo/keto reductase family protein                           | 9078  | Energy production & conversion       |
| penicillin-binding protein, 1A family                                        | 652   | Cell wall/ membrane                  |
| peptidase C1-like family                                                     | 1452  | Amino acid transport & metabolism    |
| peptidase C1-like family                                                     | 1816  | Amino acid transport & metabolism    |
| peptidase family M13                                                         | 726   | Posttranslational modification       |
| peptidase T                                                                  | 1089  | Amino acid transport & metabolism    |
| peptide chain release factor 1                                               | 6173  | Translation                          |
| peptide chain release factor 2                                               | 726   | Translation                          |
| peptide chain release factor 3                                               | 1089  | Translation                          |
| peptide deformylase                                                          | 1089  | Translation                          |
| phenylalanine--tRNA ligase, beta subunit                                     | 2542  | Translation                          |
| phosphate acetyltransferase                                                  | 1816  | Energy production & conversion       |
| phosphate/phosphite/phosphonate ABC transporter, periplasmic binding protein | 1089  | Inorganic ion transport & metabolism |
| phosphoenolpyruvate carboxykinase (GTP)                                      | 10167 | Coenzyme transport & metabolism      |
| phosphoenolpyruvate carboxykinase (GTP)                                      | 11619 | Coenzyme transport & metabolism      |
| phosphoenolpyruvate-dependent sugar phosphotransferase system, EIIA 2        | 704   | Carbohydrate transport & metabolism  |
| phosphoenolpyruvate-protein phosphotransferase                               | 7988  | Carbohydrate transport & metabolism  |
| phosphoglucomutase/phosphomannomutase, alpha/beta/alpha domain II            | 2542  | Carbohydrate transport & metabolism  |
| phosphoglucosamine mutase                                                    | 7262  | Carbohydrate transport & metabolism  |



|                                                                   |       |                                     |
|-------------------------------------------------------------------|-------|-------------------------------------|
| phosphoglycerate kinase                                           | 3268  | Nucleotide transport & metabolism   |
| phosphoglycerate kinase                                           | 3268  | Nucleotide transport & metabolism   |
| phosphoglycerate mutase 1 family                                  | 6173  | Carbohydrate transport & metabolism |
| phosphopyruvate hydratase                                         | 1089  | Carbohydrate transport & metabolism |
| phosphorylase family                                              | 2542  | Nucleotide transport & metabolism   |
| PPIC-type PPIASE domain protein                                   | 3994  | Cell wall/ membrane                 |
| preprotein translocase, YajC subunit                              | 726   | Intracellular trafficking           |
| proline--tRNA ligase                                              | 1089  | Translation                         |
| proline-specific peptidase                                        | 5084  | Amino acid transport & metabolism   |
| protein-(glutamine-N5) methyltransferase, release factor-specific | 3631  | Translation                         |
| PTS system, mannose/fructose/sorbose family, IIB component        | 652   | Carbohydrate transport & metabolism |
| PTS system, mannose/fructose/sorbose family, IID component        | 726   | Carbohydrate transport & metabolism |
| pur operon repressor PurR                                         | 1089  | Nucleotide transport & metabolism   |
| putative catabolite control protein A                             | 3994  | Transcription                       |
| putative citrate (pro-3S)-lyase, beta subunit                     | 1452  | Carbohydrate transport & metabolism |
| putative fructose-1,6-bisphosphate aldolase, class II             | 7262  | Carbohydrate transport & metabolism |
| putative glycerol-3-phosphate dehydrogenase [NAD(P)+]             | 5447  | Lipid transport & metabolism        |
| putative glyoxylate reductase                                     | 3268  | Coenzyme transport & metabolism     |
| putative glyoxylate reductase                                     | 3268  | Energy production & conversion      |
| putative GTP-binding protein TypA                                 | 9078  | Signal transduction mechanisms      |
| putative phosphoglucomutase                                       | 2542  | Carbohydrate transport & metabolism |
| putative ribosomal protein S1                                     | 5447  | Translation                         |
| putative RNA methyltransferase, TrmH family, group 2              | 2179  | Translation                         |
| putative translation elongation factor G                          | 1089  | Translation                         |
| pyruvate kinase                                                   | 36674 | Carbohydrate transport & metabolism |
| pyruvate kinase                                                   | 36674 | Carbohydrate transport & metabolism |
| pyruvate oxidase                                                  | 3994  | Coenzyme transport & metabolism     |
| pyruvate oxidase                                                  | 3994  | Amino acid transport & metabolism   |

|                                                     |      |                                        |
|-----------------------------------------------------|------|----------------------------------------|
| RecA protein                                        | 726  | Replication, recombination, and repair |
| ribonucleoside-diphosphate reductase subunit beta   | 7262 | Nucleotide transport & metabolism      |
| ribonucleoside-diphosphate reductase, alpha subunit | 5084 | Nucleotide transport & metabolism      |
| ribonucleoside-diphosphate reductase, alpha subunit | 5084 | Nucleotide transport & metabolism      |
| ribonucleoside-diphosphate reductase, beta subunit  | 6536 | Nucleotide transport & metabolism      |
| ribose-phosphate diphosphokinase                    | 1452 | Nucleotide transport & metabolism      |
| ribosomal protein L1                                | 3994 | Translation                            |
| ribosomal protein L10                               | 2542 | Translation                            |
| ribosomal protein L11                               | 726  | Translation                            |
| ribosomal protein L11 methyltransferase             | 1452 | Translation                            |
| ribosomal protein L13                               | 1089 | Translation                            |
| ribosomal protein L14                               | 1089 | Translation                            |
| ribosomal protein L18                               | 1089 | Translation                            |
| ribosomal protein L20                               | 726  | Translation                            |
| ribosomal protein L21                               | 704  | Translation                            |
| ribosomal protein L22                               | 1816 | Translation                            |
| ribosomal protein L23                               | 1452 | Translation                            |
| ribosomal protein L5                                | 2542 | Translation                            |
| ribosomal protein L7/L12                            | 2905 | Translation                            |
| ribosomal protein S10                               | 1089 | Translation                            |
| ribosomal protein S2                                | 3631 | Translation                            |
| ribosomal protein S3                                | 726  | Translation                            |
| ribosomal protein S5                                | 1816 | Translation                            |
| ribosomal protein S7                                | 2179 | Translation                            |
| ribosomal protein S8                                | 1089 | Translation                            |
| ribosomal subunit interface protein                 | 726  | Translation                            |
| RNA polymerase sigma factor RpoD                    | 1089 | Transcription                          |
| S-ribosylhomocysteinase LuxS                        | 3268 | Coenzyme transport & metabolism        |

|                                                                  |       |                                        |
|------------------------------------------------------------------|-------|----------------------------------------|
| serine protease do-like htrA                                     | 726   | Posttranslational modification         |
| serine--tRNA ligase                                              | 3631  | Translation                            |
| serine-type D-Ala-D-Ala carboxypeptidase                         | 704   | Cell wall/ membrane                    |
| serine-type D-Ala-D-Ala carboxypeptidase                         | 1056  | Cell wall/ membrane                    |
| signal recognition particle protein                              | 2905  | Intracellular trafficking              |
| single-strand binding family protein                             | 704   | Replication, recombination, and repair |
| Sua5/YciO/YrdC/YwlC family protein                               | 1816  | Translation                            |
| thiamine biosynthesis/tRNA modification protein ThiI             | 3268  | Coenzyme transport & metabolism        |
| threonine synthase                                               | 3994  | Amino acid transport & metabolism      |
| threonine--tRNA ligase                                           | 8715  | Translation                            |
| threonine--tRNA ligase                                           | 9441  | Translation                            |
| thymidine kinase                                                 | 1452  | Nucleotide transport & metabolism      |
| thymidylate synthase                                             | 2905  | Nucleotide transport & metabolism      |
| thymidylate synthase                                             | 3268  | Nucleotide transport & metabolism      |
| transcription termination factor NusA                            | 7262  | Transcription                          |
| translation elongation factor G                                  | 21786 | Translation                            |
| translation elongation factor Ts                                 | 1816  | Translation                            |
| triacylglycerol lipase                                           | 3631  | Lipid transport & metabolism           |
| trigger factor                                                   | 5810  | Cell division                          |
| triose-phosphate isomerase                                       | 11983 | Carbohydrate transport & metabolism    |
| tRNA (5-methylaminomethyl-2-thiouridylate)-methyltransferase     | 726   | Translation                            |
| tRNA (guanine-N(1)-)-methyltransferase                           | 726   | Translation                            |
| tRNA (guanine-N(1)-)-methyltransferase                           | 726   | Translation                            |
| tRNA (guanine-N(7)-)-methyltransferase                           | 726   | Translation                            |
| tRNA nucleotidyltransferase/poly(A) polymerase family protein    | 1089  | Translation                            |
| tRNA pseudouridine synthase B                                    | 652   | Translation                            |
| tRNA uridine 5-carboxymethylaminomethyl modification enzyme GidA | 1089  | Cell division                          |
| tryptophan--tRNA ligase                                          | 704   | Translation                            |

|                                                                                     |      |                                   |
|-------------------------------------------------------------------------------------|------|-----------------------------------|
| tyrosine--tRNA ligase                                                               | 3268 | Translation                       |
| UDP-glucose 4-epimerase                                                             | 3994 | Cell wall/ membrane               |
| UDP-N-acetylglucosamine diphosphorylase/glucosamine-1-phosphate N-acetyltransferase | 3268 | Cell wall/ membrane               |
| UDP-N-acetylmuramate--alanine ligase                                                | 1452 | Cell wall/ membrane               |
| UDP-N-acetylmuramate--L-alanine ligase                                              | 1452 | Cell wall/ membrane               |
| UDP-N-acetylmuramate--L-alanine ligase                                              | 2542 | Cell wall/ membrane               |
| UDP-N-acetylmuramoyl-L-alanine--D-glutamate ligase                                  | 1089 | Cell wall/ membrane               |
| UDP-N-acetylmuramoyl-L-alanyl-D-glutamate--2, 6-diaminopimelate ligase              | 726  | Cell wall/ membrane               |
| UDP-N-acetylmuramoyl-tripeptide--D-alanyl-D- alanine ligase                         | 2542 | Cell wall/ membrane               |
| UDP-N-acetylmuramoyl-tripeptide--D-alanyl-D- alanine ligase                         | 3268 | Cell wall/ membrane               |
| UMP kinase                                                                          | 1089 | Nucleotide transport & metabolism |
| undecaprenyldiphospho-muramoylpentapeptide beta-N-acetylglucosaminyltransferase     | 726  | Cell wall/ membrane               |
| universal stress family protein                                                     | 1816 | Signal transduction mechanisms    |
| uracil phosphoribosyltransferase                                                    | 2542 | Nucleotide transport & metabolism |
| UTP--glucose-1-phosphate uridylyltransferase                                        | 1452 | Cell wall/ membrane               |
| valine--tRNA ligase                                                                 | 6899 | Translation                       |
| Xaa-Pro dipeptidase                                                                 | 5447 | Amino acid transport & metabolism |
| Xaa-Pro dipeptidyl-peptidase                                                        | 652  | Amino acid transport & metabolism |
| YSIRK family Gram-positive signal peptide                                           | 1452 | Cell wall/ membrane               |

Supplemental Table 4. List of proteins, their abundance, and their associated functional pathway identified in *M. mulieris* bEVs.

| <b>Protein Name</b>                                                      | <b>Abundance (ppm)</b> | <b>Functional pathway</b>                                    |
|--------------------------------------------------------------------------|------------------------|--------------------------------------------------------------|
| 1-deoxy-D-xylulose 5-phosphate reductoisomerase                          | 493                    | Lipid transport & metabolism                                 |
| 1,4-alpha-glucan branching enzyme                                        | 1150                   | Carbohydrate transport & metabolism                          |
| 3-dehydroquinate synthase                                                | 1807                   | Energy production & conversion                               |
| 30S ribosomal protein S1                                                 | 4763                   | Translation                                                  |
| 30S ribosomal protein S13                                                | 425                    | Translation                                                  |
| 30S ribosomal protein S17                                                | 329                    | Translation                                                  |
| 4-alpha-glucanotransferase                                               | 2792                   | Carbohydrate transport & metabolism                          |
| 5-methyltetrahydropteroyltriglutamate-- homocysteine S-methyltransferase | 6242                   | Coenzyme transport & metabolism                              |
| 50S ribosomal protein L3                                                 | 599                    | Translation                                                  |
| 50S ribosomal protein L4                                                 | 493                    | Translation                                                  |
| 6-phosphofructokinase                                                    | 1643                   | Carbohydrate transport & metabolism                          |
| ABC transporter, ATP-binding protein                                     | 329                    | Defense mechanisms                                           |
| ABC transporter, ATP-binding protein                                     | 599                    | Amino acid transport & metabolism                            |
| ABC transporter, ATP-binding protein                                     | 1150                   | Carbohydrate transport & metabolism                          |
| ABC transporter, ATP-binding protein                                     | 6406                   | Inorganic ion transport & metabolism                         |
| ABC transporter, permease protein                                        | 329                    | Inorganic ion transport & metabolism                         |
| ABC transporter, solute-binding protein                                  | 16590                  | Carbohydrate transport & metabolism                          |
| ABC transporter, substrate-binding protein                               | 1971                   | Inorganic ion transport & metabolism                         |
| ABC transporter, substrate-binding protein, family 3                     | 4106                   | Signal transduction mechanisms                               |
| ABC transporter, substrate-binding protein, family 3                     | 4106                   | Amino acid transport & metabolism                            |
| ABC transporter, substrate-binding protein, family 5                     | 821                    | Amino acid transport & metabolism                            |
| ABC transporter, substrate-binding protein, thiB family                  | 1478                   | Coenzyme transport & metabolism                              |
| acetate kinase                                                           | 3778                   | Coenzyme transport & metabolism                              |
| acetyl xylan esterase (AXE1)                                             | 599                    | Secondary metabolites biosynthesis, transport and catabolism |

|                                                             |       |                                     |
|-------------------------------------------------------------|-------|-------------------------------------|
| adenylate kinase                                            | 1807  | Nucleotide transport & metabolism   |
| adenylosuccinate synthase                                   | 2300  | Nucleotide transport & metabolism   |
| alanine racemase                                            | 1643  | Cell wall/ membrane                 |
| alanine--tRNA ligase                                        | 2135  | Translation                         |
| alpha amylase, catalytic domain protein                     | 1971  | Carbohydrate transport & metabolism |
| alpha-glucan phosphorylase                                  | 23982 | Carbohydrate transport & metabolism |
| aminotransferase, class I/II                                | 2792  | Amino acid transport & metabolism   |
| aminotransferase, class III                                 | 799   | Amino acid transport & metabolism   |
| AMP-binding enzyme                                          | 1198  | Lipid transport & metabolism        |
| Anticodon-binding domain protein                            | 2300  | Translation                         |
| AP endonuclease, family 2                                   | 986   | Carbohydrate transport & metabolism |
| apolipoprotein N-acyltransferase                            | 399   | Cell wall/ membrane                 |
| arabinose isomerase                                         | 1314  | Carbohydrate transport & metabolism |
| arginine--tRNA ligase                                       | 657   | Translation                         |
| argininosuccinate lyase                                     | 329   | Amino acid transport & metabolism   |
| argininosuccinate synthase                                  | 2135  | Amino acid transport & metabolism   |
| aspartate--tRNA ligase                                      | 986   | Translation                         |
| aspartyl/glutamyl-tRNA(Asn/Gln) amidotransferase, A subunit | 1478  | Translation                         |
| aspartyl/glutamyl-tRNA(Asn/Gln) amidotransferase, B subunit | 4763  | Translation                         |
| ATP synthase F1, delta subunit                              | 657   | Energy production & conversion      |
| ATP synthase F1, gamma subunit                              | 1643  | Energy production & conversion      |
| ATP-dependent chaperone protein ClpB                        | 3121  | Posttranslational modification      |
| ATP-dependent metalloproteinase HflB                        | 329   | Posttranslational modification      |
| bacterial cytochrome ubiquinol oxidase                      | 638   | Energy production & conversion      |
| bacterial flagellin domain protein                          | 1643  | Cell motility                       |
| branched-chain amino acid ABC transporter, permease protein | 329   | Carbohydrate transport & metabolism |
| branched-chain-amino-acid transaminase                      | 2628  | Coenzyme transport & metabolism     |
| branched-chain-amino-acid transaminase                      | 2628  | Amino acid transport & metabolism   |

|                                                                                  |      |                                        |
|----------------------------------------------------------------------------------|------|----------------------------------------|
| BRO family, N-terminal domain protein                                            | 329  | Transcription                          |
| carbohydrate kinase, FGGY family protein                                         | 821  | Carbohydrate transport & metabolism    |
| cell envelope-like function transcriptional attenuator common domain protein     | 493  | Transcription                          |
| chaperone protein DnaK                                                           | 493  | Posttranslational modification         |
| chaperonin GroL                                                                  | 2957 | Posttranslational modification         |
| chemotaxis response regulator protein-glutamate methylesterase of group 1 operon | 1478 | Signal transduction mechanisms         |
| chemotaxis response regulator protein-glutamate methylesterase of group 1 operon | 1478 | Cell motility                          |
| CheR methyltransferase, SAM binding domain protein                               | 657  | Signal transduction mechanisms         |
| CheR methyltransferase, SAM binding domain protein                               | 657  | Cell motility                          |
| CheW-like protein                                                                | 3121 | Signal transduction mechanisms         |
| CRISPR system CASCADE complex protein CasC                                       | 329  | Replication, recombination, and repair |
| cysteine desulfurase, SufS subfamily                                             | 1150 | Amino acid transport & metabolism      |
| cysteine synthase A                                                              | 4106 | Amino acid transport & metabolism      |
| cysteine--tRNA ligase                                                            | 2628 | Translation                            |
| cytosol aminopeptidase family, catalytic domain protein                          | 2300 | Amino acid transport & metabolism      |
| D-ala D-ala ligase N-terminal domain protein                                     | 657  | Nucleotide transport & metabolism      |
| D-alanyl-D-alanine carboxypeptidase/D-alanyl-D-alanine-endopeptidase             | 986  | Cell wall/ membrane                    |
| DegT/DnrJ/EryC1/StrS aminotransferase family protein                             | 2135 | Amino acid transport & metabolism      |
| diaminopimelate decarboxylase                                                    | 799  | Amino acid transport & metabolism      |
| dihydrodipicolinate synthase                                                     | 329  | Amino acid transport & metabolism      |
| dihydrolipoyl dehydrogenase                                                      | 399  | Energy production & conversion         |
| dihydroxyacetone kinase, DhaK subunit                                            | 1971 | Carbohydrate transport & metabolism    |
| dihydroxyacetone kinase, L subunit                                               | 329  | Carbohydrate transport & metabolism    |
| DivIVA domain repeat protein                                                     | 1150 | Cell division                          |
| DNA (cytosine-5-)-methyltransferase                                              | 1150 | Replication, recombination, and repair |
| DNA gyrase, A subunit                                                            | 493  | Replication, recombination, and repair |
| DNA polymerase III, beta subunit                                                 | 657  | Replication, recombination, and repair |
| DNA-binding regulatory protein, YebC/PmpR family                                 | 599  | Transcription                          |

|                                          |      |                                                              |
|------------------------------------------|------|--------------------------------------------------------------|
| DsbA-like protein                        | 657  | Posttranslational modification                               |
| dTDP-4-dehydrorhamnose reductase         | 1150 | Cell wall/ membrane                                          |
| dTDP-glucose 4,6-dehydratase             | 3285 | Cell wall/ membrane                                          |
| dTMP kinase                              | 399  | Nucleotide transport & metabolism                            |
| efflux ABC transporter, permease protein | 399  | Defense mechanisms                                           |
| endopeptidase Clp                        | 425  | Intracellular trafficking                                    |
| endopeptidase Clp                        | 425  | Posttranslational modification                               |
| exonuclease                              | 821  | Replication, recombination, and repair                       |
| export membrane protein SecD             | 329  | Intracellular trafficking                                    |
| export membrane protein SecF             | 399  | Intracellular trafficking                                    |
| FAH family protein                       | 329  | Secondary metabolites biosynthesis, transport and catabolism |
| FemAB family protein                     | 799  | Defense mechanisms                                           |
| ferritin-like protein                    | 2300 | Inorganic ion transport & metabolism                         |
| ferrochelatase                           | 821  | Coenzyme transport & metabolism                              |
| FeS assembly ATPase SufC                 | 1643 | Posttranslational modification                               |
| FeS assembly protein SufB                | 2135 | Posttranslational modification                               |
| FeS assembly protein SufD                | 329  | Posttranslational modification                               |
| FGGY-family pentulose kinase             | 329  | Carbohydrate transport & metabolism                          |
| FHA domain protein                       | 399  | Signal transduction mechanisms                               |
| fimbrial subunit type 1                  | 821  | Cell wall/ membrane                                          |
| flagellar basal-body rod protein FlgC    | 399  | Cell motility                                                |
| flagellar hook-basal body protein        | 2300 | Cell motility                                                |
| flagellar motor switch protein FliN      | 329  | Cell motility                                                |
| formyltetrahydrofolate deformylase       | 799  | Nucleotide transport & metabolism                            |
| fructose-bisphosphate aldolase, class II | 5420 | Carbohydrate transport & metabolism                          |
| FTR1 family protein                      | 329  | Inorganic ion transport & metabolism                         |
| fumarate hydratase, class II             | 3614 | Energy production & conversion                               |



|                                                            |       |                                        |
|------------------------------------------------------------|-------|----------------------------------------|
| GDSL-like protein                                          | 657   | Amino acid transport & metabolism      |
| Glu/Leu/Phe/Val dehydrogenase, dimerization domain protein | 7227  | Amino acid transport & metabolism      |
| glucose-1-phosphate adenylyltransferase                    | 329   | Coenzyme transport & metabolism        |
| glucose-1-phosphate thymidyltransferase                    | 2628  | Coenzyme transport & metabolism        |
| glutamate--tRNA ligase                                     | 1314  | Translation                            |
| glutamate-1-semialdehyde-2,1-aminomutase                   | 657   | Coenzyme transport & metabolism        |
| glutamine synthetase, type I                               | 2397  | Amino acid transport & metabolism      |
| glutamine-dependent NAD(+) synthetase domain protein       | 986   | Coenzyme transport & metabolism        |
| glutamine-fructose-6-phosphate transaminase (isomerizing)  | 799   | Cell wall/ membrane                    |
| glyceraldehyde-3-phosphate dehydrogenase, type I           | 12155 | Carbohydrate transport & metabolism    |
| glycerate kinase                                           | 986   | Carbohydrate transport & metabolism    |
| glycerol kinase                                            | 493   | Nucleotide transport & metabolism      |
| glycerol-3-phosphate dehydrogenase, anaerobic, A subunit   | 329   | Energy production & conversion         |
| glycerol-3-phosphate dehydrogenase, anaerobic, B subunit   | 2135  | Amino acid transport & metabolism      |
| glycine hydroxymethyltransferase                           | 3121  | Amino acid transport & metabolism      |
| glycine--tRNA ligase                                       | 1807  | Translation                            |
| glycogen debranching enzyme GlgX                           | 493   | Carbohydrate transport & metabolism    |
| glycogen synthase, Corynebacterium family                  | 599   | Carbohydrate transport & metabolism    |
| glycosyl hydrolase, family 31                              | 329   | Carbohydrate transport & metabolism    |
| glycosyltransferase, group 1 family protein                | 657   | Cell wall/ membrane                    |
| GMP synthase (glutamine-hydrolyzing) domain protein        | 399   | Nucleotide transport & metabolism      |
| GroES-like protein                                         | 493   | Energy production & conversion         |
| GTP cyclohydrolase I                                       | 399   | Nucleotide transport & metabolism      |
| GTP-binding protein LepA                                   | 599   | Cell wall/ membrane                    |
| HAD hydrolase, family IIA                                  | 1478  | Carbohydrate transport & metabolism    |
| helicase C-terminal domain protein                         | 329   | Replication, recombination, and repair |
| helicase C-terminal domain protein                         | 329   | Transcription                          |
| histidine triad domain protein                             | 657   | Carbohydrate transport & metabolism    |

|                                                          |      |                                        |
|----------------------------------------------------------|------|----------------------------------------|
| histidine triad domain protein                           | 657  | Nucleotide transport & metabolism      |
| histidine--tRNA ligase                                   | 2135 | Translation                            |
| homoserine dehydrogenase                                 | 329  | Amino acid transport & metabolism      |
| hypothetical protein                                     | 799  | Replication, recombination, and repair |
| hypothetical protein                                     | 821  | Cell wall/ membrane                    |
| hypothetical protein                                     | 986  | Translation                            |
| hypothetical protein                                     | 986  | Coenzyme transport & metabolism        |
| hypothetical protein                                     | 1150 | Posttranslational modification         |
| hypothetical protein                                     | 2300 | Cell motility                          |
| hypothetical protein                                     | 2464 | Carbohydrate transport & metabolism    |
| hypothetical protein                                     | 2957 | Inorganic ion transport & metabolism   |
| hypothetical protein                                     | 5420 | Cytoskeleton                           |
| hypothetical protein                                     | 5420 | Cell division                          |
| hypothetical protein                                     | 5992 | Defense mechanisms                     |
| hypoxanthine phosphoribosyltransferase                   | 329  | Nucleotide transport & metabolism      |
| inorganic diphosphatase                                  | 329  | Energy production & conversion         |
| iron dependent repressor DNA binding domain protein      | 1478 | Transcription                          |
| isocitrate dehydrogenase, NADP-dependent                 | 986  | Energy production & conversion         |
| isoleucine--tRNA ligase                                  | 2792 | Translation                            |
| kinase domain protein                                    | 986  | Signal transduction mechanisms         |
| kinase domain protein                                    | 986  | Replication, recombination, and repair |
| kinase domain protein                                    | 986  | Transcription                          |
| L-lactate dehydrogenase                                  | 2300 | Energy production & conversion         |
| lactaldehyde reductase                                   | 5913 | Energy production & conversion         |
| leucine--tRNA ligase                                     | 4435 | Translation                            |
| Lon protease (S16) C-terminal proteolytic domain protein | 493  | Signal transduction mechanisms         |
| LPXTG-motif cell wall anchor domain protein              | 7720 | Intracellular trafficking              |
| LPXTG-motif cell wall anchor domain protein              | 7720 | Cell motility                          |

|                                                                            |      |                                      |
|----------------------------------------------------------------------------|------|--------------------------------------|
| malate dehydrogenase                                                       | 3285 | Energy production & conversion       |
| mannose-6-phosphate isomerase, class I                                     | 493  | Carbohydrate transport & metabolism  |
| methionine adenosyltransferase                                             | 2300 | Coenzyme transport & metabolism      |
| methionine aminopeptidase, type I                                          | 657  | Amino acid transport & metabolism    |
| methionine--tRNA ligase                                                    | 1643 | Translation                          |
| methionyl-tRNA formyltransferase                                           | 329  | Translation                          |
| methyl-accepting chemotaxis protein signaling domain protein               | 329  | Signal transduction mechanisms       |
| methyl-accepting chemotaxis protein signaling domain protein               | 329  | Cell motility                        |
| MgtE intracellular domain protein                                          | 329  | Inorganic ion transport & metabolism |
| MIP family channel protein                                                 | 599  | Intracellular trafficking            |
| N-acetylmuramoyl-L-alanine amidase                                         | 8049 | Cell wall/ membrane                  |
| N-acylglucosamine 2-epimerase                                              | 493  | Carbohydrate transport & metabolism  |
| Na <sup>+</sup> /H <sup>+</sup> antiporter NhaA                            | 329  | Inorganic ion transport & metabolism |
| NAD dependent epimerase/dehydratase family protein                         | 399  | Cell wall/ membrane                  |
| NAD-dependent glycerol-3-phosphate dehydrogenase C-terminal domain protein | 399  | Lipid transport & metabolism         |
| NAD(P)(+) transhydrogenase (AB-specific), alpha subunit                    | 399  | Energy production & conversion       |
| NADH dehydrogenase (quinone), G subunit                                    | 657  | Energy production & conversion       |
| NADH dehydrogenase subunit D                                               | 399  | Energy production & conversion       |
| nicotinate phosphoribosyltransferase                                       | 1971 | Coenzyme transport & metabolism      |
| nitroreductase family protein                                              | 1643 | Energy production & conversion       |
| NLPA lipoprotein                                                           | 4271 | Cell wall/ membrane                  |
| NlpC/P60 family protein                                                    | 1478 | Cell wall/ membrane                  |
| NMT1/THI5-like protein                                                     | 657  | Inorganic ion transport & metabolism |
| non-canonical purine NTP pyrophosphatase, RdgB/HAM1 family                 | 329  | Nucleotide transport & metabolism    |
| nucleotide sugar dehydrogenase                                             | 821  | Cell wall/ membrane                  |
| nucleotidyl transferase                                                    | 1478 | Cell wall/ membrane                  |
| O-acetylhomoserine aminocarboxypropyltransferase/cysteine synthase         | 1314 | Amino acid transport & metabolism    |

|                                                                   |       |                                                              |
|-------------------------------------------------------------------|-------|--------------------------------------------------------------|
| O-succinylbenzoate-CoA ligase family protein                      | 329   | Secondary metabolites biosynthesis, transport and catabolism |
| O-succinylbenzoate-CoA ligase family protein                      | 329   | Lipid transport & metabolism                                 |
| orotate phosphoribosyltransferase                                 | 493   | Nucleotide transport & metabolism                            |
| orotidine 5'-phosphate decarboxylase                              | 986   | Nucleotide transport & metabolism                            |
| oxidoreductase, aldo/keto reductase family protein                | 329   | Energy production & conversion                               |
| oxidoreductase, FAD/FMN-binding protein                           | 1598  | Energy production & conversion                               |
| oxoglutarate dehydrogenase (succinyl-transferring), E1 component  | 1314  | Energy production & conversion                               |
| penicillin-binding protein, transpeptidase domain protein         | 986   | Cell wall/ membrane                                          |
| peptidase, M23 family                                             | 6078  | Cell wall/ membrane                                          |
| peptide deformylase                                               | 329   | Translation                                                  |
| peptidyl-prolyl cis-trans isomerase B                             | 986   | Carbohydrate transport & metabolism                          |
| peptidyl-prolyl cis-trans isomerase, FKBP-type                    | 4106  | Cell wall/ membrane                                          |
| peptidyl-prolyl cis-trans isomerase, FKBP-type                    | 5420  | Posttranslational modification                               |
| periplasmic binding protein                                       | 821   | Inorganic ion transport & metabolism                         |
| permease, cytosine/purine, uracil, thiamine, allantoin family     | 425   | Intracellular trafficking                                    |
| phenylalanine--tRNA ligase, alpha subunit                         | 1314  | Translation                                                  |
| phenylalanine--tRNA ligase, beta subunit                          | 3121  | Translation                                                  |
| phosphate acetyltransferase                                       | 1807  | Energy production & conversion                               |
| phosphoenolpyruvate carboxykinase (GTP)                           | 30223 | Coenzyme transport & metabolism                              |
| phosphoenolpyruvate-protein phosphotransferase                    | 329   | Carbohydrate transport & metabolism                          |
| Phosphofructokinase                                               | 1314  | Coenzyme transport & metabolism                              |
| phosphoglucomutase, alpha-D-glucose phosphate-specific            | 5913  | Carbohydrate transport & metabolism                          |
| phosphoglucomutase/phosphomannomutase, alpha/beta/alpha domain II | 3121  | Carbohydrate transport & metabolism                          |
| phosphoglucosamine mutase                                         | 1643  | Carbohydrate transport & metabolism                          |
| phosphoglycerate kinase                                           | 3121  | Nucleotide transport & metabolism                            |
| phosphoglycerate mutase 1 family                                  | 7392  | Carbohydrate transport & metabolism                          |
| phosphoglycerate mutase family protein                            | 399   | Carbohydrate transport & metabolism                          |

|                                                                                       |      |                                                              |
|---------------------------------------------------------------------------------------|------|--------------------------------------------------------------|
| phosphopyruvate hydratase                                                             | 986  | Coenzyme transport & metabolism                              |
| phosphoribosylaminoimidazole carboxylase, ATPase subunit                              | 329  | Nucleotide transport & metabolism                            |
| phosphoribosylaminoimidazolesuccinocarboxamide synthase                               | 1807 | Nucleotide transport & metabolism                            |
| phosphoribosylformylglycinamide synthase I                                            | 599  | Nucleotide transport & metabolism                            |
| phosphoribosylformylglycinamide synthase II                                           | 1807 | Nucleotide transport & metabolism                            |
| polyphosphate kinase 1                                                                | 599  | Inorganic ion transport & metabolism                         |
| polyprenyl synthetase                                                                 | 1398 | Coenzyme transport & metabolism                              |
| preprotein translocase, SecA subunit                                                  | 6406 | Intracellular trafficking                                    |
| proline--tRNA ligase                                                                  | 3285 | Translation                                                  |
| putative adenine phosphoribosyltransferase                                            | 399  | Nucleotide transport & metabolism                            |
| putative cell wall binding repeat 2                                                   | 329  | Secondary metabolites biosynthesis, transport and catabolism |
| putative cell wall binding repeat 2                                                   | 4928 | Cytoskeleton                                                 |
| putative cell wall binding repeat 2                                                   | 4928 | Cell division                                                |
| putative cell wall binding repeat 2                                                   | 5585 | Cell wall/ membrane                                          |
| putative dTDP-4-dehydrorhamnose 3,5-epimerase                                         | 657  | Cell wall/ membrane                                          |
| putative flagellar basal-body rod protein FlgB                                        | 329  | Cell motility                                                |
| putative glucosamine-6-phosphate deaminase                                            | 986  | Carbohydrate transport & metabolism                          |
| putative glycoprotease GCP                                                            | 821  | Posttranslational modification                               |
| putative HAD hydrolase, TIGR01457 family                                              | 1314 | Carbohydrate transport & metabolism                          |
| putative L-ribulose-5-phosphate 4-epimerase                                           | 657  | Carbohydrate transport & metabolism                          |
| putative N-acetylglucosamine-6-phosphate deacetylase                                  | 1643 | Carbohydrate transport & metabolism                          |
| putative NADH oxidoreductase (quinone), F subunit                                     | 493  | Energy production & conversion                               |
| putative phosphoglycerate dehydrogenase                                               | 1478 | Coenzyme transport & metabolism                              |
| putative phosphoglycerate dehydrogenase                                               | 1478 | Amino acid transport & metabolism                            |
| putative phosphoribosylaminoimidazolecarboxamide formyltransferase/IMP cyclohydrolase | 599  | Nucleotide transport & metabolism                            |
| putative phosphoserine transaminase                                                   | 329  | Amino acid transport & metabolism                            |
| pyridine nucleotide-disulfide oxidoreductase                                          | 329  | Inorganic ion transport & metabolism                         |

|                                                        |       |                                     |
|--------------------------------------------------------|-------|-------------------------------------|
| pyridoxal 5'-phosphate synthase, synthase subunit Pdx1 | 425   | Coenzyme transport & metabolism     |
| pyrimidine-nucleoside phosphorylase                    | 657   | Nucleotide transport & metabolism   |
| pyruvate kinase                                        | 5585  | Carbohydrate transport & metabolism |
| pyruvate, phosphate dikinase                           | 12319 | Carbohydrate transport & metabolism |
| response regulator receiver domain protein             | 399   | Signal transduction mechanisms      |
| rhamnan synthesis protein F                            | 399   | Cell wall/ membrane                 |
| ribonucleoside-diphosphate reductase, beta subunit     | 599   | Nucleotide transport & metabolism   |
| ribose 5-phosphate isomerase                           | 493   | Carbohydrate transport & metabolism |
| ribose-phosphate diphosphokinase                       | 657   | Nucleotide transport & metabolism   |
| ribosomal protein L1                                   | 986   | Translation                         |
| ribosomal protein L10                                  | 329   | Translation                         |
| ribosomal protein L13                                  | 657   | Translation                         |
| ribosomal protein L14                                  | 329   | Translation                         |
| ribosomal protein L15                                  | 399   | Translation                         |
| ribosomal protein L16                                  | 399   | Translation                         |
| ribosomal protein L17                                  | 1314  | Translation                         |
| ribosomal protein L19                                  | 599   | Translation                         |
| ribosomal protein L20                                  | 399   | Translation                         |
| ribosomal protein L25, Ctc-form                        | 399   | Translation                         |
| ribosomal protein L5                                   | 657   | Translation                         |
| ribosomal protein L7/L12                               | 493   | Translation                         |
| ribosomal protein S10                                  | 329   | Translation                         |
| ribosomal protein S12                                  | 399   | Translation                         |
| ribosomal protein S2                                   | 3942  | Translation                         |
| ribosomal protein S3                                   | 1314  | Translation                         |
| ribosomal protein S4                                   | 1971  | Translation                         |
| ribosomal protein S5                                   | 821   | Translation                         |
| ribosomal subunit interface protein                    | 1971  | Translation                         |

|                                                                     |       |                                     |
|---------------------------------------------------------------------|-------|-------------------------------------|
| ribulokinase                                                        | 821   | Carbohydrate transport & metabolism |
| ROK family protein                                                  | 1314  | Transcription                       |
| ROK family protein                                                  | 1314  | Carbohydrate transport & metabolism |
| S-adenosyl-methyltransferase MraW                                   | 329   | Translation                         |
| S1 RNA binding domain protein                                       | 399   | Translation                         |
| serine--tRNA ligase                                                 | 1314  | Translation                         |
| signal peptidase I                                                  | 657   | Intracellular trafficking           |
| signal peptidase II                                                 | 599   | Intracellular trafficking           |
| signal peptidase II                                                 | 599   | Cell wall/ membrane                 |
| signal recognition particle protein                                 | 821   | Intracellular trafficking           |
| signal recognition particle-docking protein FtsY                    | 657   | Intracellular trafficking           |
| SIS domain protein                                                  | 399   | Cell wall/ membrane                 |
| Sua5/YciO/YrdC/Ywlc family protein                                  | 329   | Translation                         |
| succinate dehydrogenase or fumarate reductase, flavoprotein subunit | 2792  | Energy production & conversion      |
| succinate-CoA ligase, beta subunit                                  | 399   | Nucleotide transport & metabolism   |
| sugar-binding domain protein                                        | 20039 | Carbohydrate transport & metabolism |
| sugar-phosphate isomerase, RpiB/LacA/LacB family                    | 1150  | Carbohydrate transport & metabolism |
| TAP-like protein                                                    | 5913  | Cell wall/ membrane                 |
| Tat pathway signal sequence domain protein                          | 657   | Amino acid transport & metabolism   |
| thiamine diphosphokinase                                            | 399   | Coenzyme transport & metabolism     |
| thiamine pyrophosphate enzyme, central domain protein               | 599   | Amino acid transport & metabolism   |
| thiol reductant ABC exporter, CydC subunit                          | 399   | Posttranslational modification      |
| thiol reductant ABC exporter, CydC subunit                          | 399   | Energy production & conversion      |
| threonine synthase                                                  | 986   | Amino acid transport & metabolism   |
| transcription termination factor NusA                               | 1150  | Transcription                       |
| transcriptional regulator, GntR family                              | 799   | Transcription                       |
| transcriptional regulator, IclR family, C-terminal domain protein   | 599   | Transcription                       |
| transglycosylase                                                    | 5749  | Cell wall/ membrane                 |

|                                                                                     |       |                                        |
|-------------------------------------------------------------------------------------|-------|----------------------------------------|
| transketolase                                                                       | 2135  | Carbohydrate transport & metabolism    |
| translation elongation factor Tu                                                    | 13633 | Translation                            |
| translation initiation factor IF-2                                                  | 1971  | Translation                            |
| transporter, lactate permease (LctP) family                                         | 599   | Energy production & conversion         |
| trigger factor                                                                      | 5256  | Cell division                          |
| tRNA nucleotidyltransferase                                                         | 493   | Translation                            |
| tRNA-guanine transglycosylase                                                       | 493   | Nucleotide transport & metabolism      |
| trypsin                                                                             | 799   | Cell wall/ membrane                    |
| trypsin                                                                             | 986   | Posttranslational modification         |
| tryptophan synthase, beta subunit                                                   | 2300  | Amino acid transport & metabolism      |
| tryptophan--tRNA ligase                                                             | 821   | Translation                            |
| type III restriction enzyme, res subunit                                            | 399   | Replication, recombination, and repair |
| tyrosine--tRNA ligase                                                               | 2792  | Translation                            |
| UbiC transcription regulator-associated domain protein                              | 329   | Transcription                          |
| UDP-galactopyranose mutase                                                          | 2628  | Cell wall/ membrane                    |
| UDP-glucose 4-epimerase                                                             | 799   | Cell wall/ membrane                    |
| UDP-N-acetylglucosamine 1-carboxyvinyltransferase                                   | 599   | Cell wall/ membrane                    |
| UDP-N-acetylglucosamine 2-epimerase                                                 | 1807  | Carbohydrate transport & metabolism    |
| UDP-N-acetylglucosamine diphosphorylase/glucosamine-1-phosphate N-acetyltransferase | 986   | Cell wall/ membrane                    |
| UDP-N-acetylmuramoyl-L-alanine--D-glutamate ligase                                  | 329   | Cell wall/ membrane                    |
| UDP-N-acetylmuramoyl-L-alanyl-D-glutamate--2, 6-diaminopimelate ligase              | 986   | Cell wall/ membrane                    |
| UDP-N-acetylmuramoyl-tripeptide--D-alanyl-D- alanine ligase                         | 657   | Cell wall/ membrane                    |
| UMP kinase                                                                          | 657   | Nucleotide transport & metabolism      |
| undecaprenyl-diphosphatase UppP                                                     | 399   | Defense mechanisms                     |
| undecaprenyldiphospho-muramoylpentapeptide beta-N-acetylglucosaminyltransferase     | 329   | Cell wall/ membrane                    |
| uracil phosphoribosyltransferase                                                    | 1150  | Nucleotide transport & metabolism      |
| uroporphyrinogen-III synthase                                                       | 599   | Coenzyme transport & metabolism        |
| UTP--hexose-1-phosphate uridylyltransferase                                         | 999   | Energy production & conversion         |



|                   |      |                    |
|-------------------|------|--------------------|
| VanW-like protein | 2792 | Defense mechanisms |
|-------------------|------|--------------------|

Supplemental Table 5. Cytokine expression by cervical and vaginal epithelial cell types after exposure to bEVs derived from *L. crispatus*, *G. vaginalis*, and *M. mulieris* grown in NYC culture medium, expressed as fold-changes relative to NYC culture medium controls

|                   | Ectocervical         |                     |                      |                     |                      |                     | Endocervical         |                     |                      |                     |                      |                     | Vaginal              |                     |                      |                     |                      |                     |
|-------------------|----------------------|---------------------|----------------------|---------------------|----------------------|---------------------|----------------------|---------------------|----------------------|---------------------|----------------------|---------------------|----------------------|---------------------|----------------------|---------------------|----------------------|---------------------|
|                   | <i>L. crispatus</i>  |                     | <i>G. vaginalis</i>  |                     | <i>M. mulieris</i>   |                     | <i>L. crispatus</i>  |                     | <i>G. vaginalis</i>  |                     | <i>M. mulieris</i>   |                     | <i>L. crispatus</i>  |                     | <i>G. vaginalis</i>  |                     | <i>M. mulieris</i>   |                     |
|                   | Fold-change<br>± SEM | Adjusted<br>p-value | Fold-change<br>± SEM | Adjusted<br>p-value | Fold-change<br>± SEM | Adjusted<br>p-value | Fold-change<br>± SEM | Adjusted<br>p-value | Fold-change<br>± SEM | Adjusted<br>p-value | Fold-change<br>± SEM | Adjusted<br>p-value | Fold-change<br>± SEM | Adjusted<br>p-value | Fold-change<br>± SEM | Adjusted<br>p-value | Fold-change<br>± SEM | Adjusted<br>p-value |
| <b>G-CSF</b>      | 1.05 ±<br>0.10       | ns                  | 5.58 ±<br>0.51       | <0.0001             | 7.65 ±<br>0.20       | <0.0001             | 82.67<br>±<br>81.67  | ns                  | 78130 ±<br>14070     | <0.0001             | 73210 ±<br>3643      | <0.0001             | 1.02 ±<br>0.06       | ns                  | 21.13 ±<br>2.49      | <0.0001             | 21.47 ±<br>1.10      | <0.0001             |
| <b>GM-CSF</b>     | 0.97 ±<br>0.06       | ns                  | 1.85 ±<br>0.07       | <0.0001             | 2.47 ±<br>0.01       | <0.0001             | 1.80 ±<br>0.07       | ns                  | 20.91 ±<br>2.47      | <0.0001             | 22.09 ±<br>0.73      | <0.0001             | 0.92 ±<br>0.03       | ns                  | 7.49 ±<br>0.67       | <0.0001             | 7.88 ±<br>0.29       | <0.0001             |
| <b>IFNα<br/>2</b> | 0.60 ±<br>0.59       | ns                  | 1.50 ±<br>0.39       | ns                  | 2.61 ±<br>0.96       | ns                  | 20.33<br>±<br>19.33  | ns                  | 11.00 ±<br>10.00     | ns                  | 93.00 ±<br>22.30     | 0.003               | 1.84 ±<br>1.79       | ns                  | 4.89 ±<br>2.93       | ns                  | 4.44 ±<br>2.31       | ns                  |
| <b>IFNγ</b>       | 0.45 ±<br>0.22       | ns                  | 0.80 ±<br>0.24       | ns                  | 0.71 ±<br>0.22       | ns                  | 25.00<br>±<br>14.15  | ns                  | 25.33 ±<br>9.26      | ns                  | 55.67 ±<br>5.67      | 0.0036              | 1.38 ±<br>0.66       | ns                  | 1.36 ±<br>1.00       | ns                  | 2.42 ±<br>1.37       | ns                  |
| <b>IL-10</b>      | 0.88 ±<br>0.12       | ns                  | 0.97 ±<br>0.02       | ns                  | 0.98 ±<br>0.13       | ns                  | 0.89 ±<br>0.02       | ns                  | 1.13 ±<br>0.07       | ns                  | 1.22 ±<br>0.14       | ns                  | 1.23 ±<br>0.13       | ns                  | 1.07 ±<br>0.02       | ns                  | 1.08 ±<br>0.04       | ns                  |
| <b>IL-12p40</b>   | 0.97 ±<br>0.09       | ns                  | 0.66 ±<br>0.40       | ns                  | 1.32 ±<br>0.34       | ns                  | 28.00<br>± 8.54      | ns                  | 64.67 ±<br>14.10     | 0.0298              | 80.33 ±<br>18.66     | 0.0084              | 1.00 ±<br>0.0        | ns                  | 16.93 ±<br>15.93     | ns                  | 32.87 ±<br>16.56     | ns                  |
| <b>IL-12p70</b>   | 0.75 ±<br>0.16       | ns                  | 1.03 ±<br>0.09       | ns                  | 1.08 ±<br>0.23       | ns                  | 1.26 ±<br>0.61       | ns                  | 1.87 ±<br>0.78       | ns                  | 2.11 ±<br>0.37       | ns                  | 3.03 ±<br>1.48       | ns                  | 2.48 ±<br>0.46       | ns                  | 2.62 ±<br>0.80       | ns                  |
| <b>IL-13</b>      | 1.87 ±<br>0.44       | ns                  | 4.66 ±<br>0.21       | <0.0001             | 8.25 ±<br>0.84       | 0.0018              | 1.00 ±<br>0.0        | ns                  | 29.33 ±<br>2.67      | 0.0025              | 16.33 ±<br>8.95      | ns                  | 0.88 ±<br>0.41       | ns                  | 6.81 ±<br>0.75       | ns                  | 7.32 ±<br>3.69       | ns                  |
| <b>IL-15</b>      | 0.97 ±<br>0.11       | ns                  | 0.97 ±<br>0.13       | ns                  | 1.14 ±<br>0.04       | ns                  | 1.11 ±<br>0.02       | ns                  | 1.69 ±<br>0.18       | 0.0083              | 1.58 ±<br>0.15       | 0.023               | 1.05 ±<br>0.16       | ns                  | 1.43 ±<br>0.11       | ns                  | 1.46 ±<br>0.11       | ns                  |
| <b>IL-17A</b>     | 0.07 ±<br>0.0        | ns                  | 0.93 ±<br>0.13       | ns                  | 1.14 ±<br>0.90       | ns                  | 1.00 ±<br>0.0        | ns                  | 26.67 ±<br>9.26      | 0.0289              | 18.00 ±<br>7.55      | ns                  | 15.40<br>±<br>14.40  | ns                  | 15.70 ±<br>5.99      | ns                  | 31.70 ±<br>4.61      | 0.0429              |
| <b>IL-1RA</b>     | 0.93 ±<br>0.14       | ns                  | 0.92 ±<br>0.15       | ns                  | 1.16 ±<br>0.03       | ns                  | 0.91 ±<br>0.03       | ns                  | 1.71 ±<br>0.23       | ns                  | 1.58 ±<br>0.18       | ns                  | 0.75 ±<br>0.11       | ns                  | 1.06 ±<br>0.19       | ns                  | 1.32 ±<br>0.07       | ns                  |
| <b>IL-1α</b>      | 0.98 ±<br>0.14       | ns                  | 0.98 ±<br>0.10       | ns                  | 1.25 ±<br>0.04       | ns                  | 1.03 ±<br>0.03       | ns                  | 2.19 ±<br>0.25       | 0.0061              | 2.07 ±<br>0.18       | 0.0121              | 0.89 ±<br>0.14       | ns                  | 1.28 ±<br>0.14       | ns                  | 1.61 ±<br>0.10       | ns                  |

|                                 |                   |    |                   |         |                   |         |                 |    |                   |         |                   |         |                 |    |                   |         |                    |         |
|---------------------------------|-------------------|----|-------------------|---------|-------------------|---------|-----------------|----|-------------------|---------|-------------------|---------|-----------------|----|-------------------|---------|--------------------|---------|
| <b>IL-1<math>\beta</math></b>   | 0.93 $\pm$ 0.06   | ns | 1.08 $\pm$ 0.09   | ns      | 1.18 $\pm$ 0.03   | ns      | 1.03 $\pm$ 0.02 | ns | 2.78 $\pm$ 0.22   | <0.0001 | 2.78 $\pm$ 0.22   | <0.0001 | 1.05 $\pm$ 0.13 | ns | 1.51 $\pm$ 0.04   | 0.0049  | 1.65 $\pm$ 0.05    | 0.0009  |
| <b>IL-2</b>                     | 1.01 $\pm$ 0.09   | ns | 0.74 $\pm$ 0.09   | ns      | 1.17 $\pm$ 0.11   | ns      | 1.10 $\pm$ 0.12 | ns | 1.28 $\pm$ 0.19   | ns      | 1.12 $\pm$ 0.15   | ns      | 1.68 $\pm$ 0.44 | ns | 1.15 $\pm$ 0.14   | ns      | 0.97 $\pm$ 0.15    | ns      |
| <b>IL-3</b>                     | 1.07 $\pm$ 0.02   | ns | 1.18 $\pm$ 0.10   | ns      | 1.08 $\pm$ 0.15   | ns      | 0.86 $\pm$ 0.19 | ns | 0.79 $\pm$ 0.09   | ns      | 1.02 $\pm$ 0.15   | ns      | 0.74 $\pm$ 0.14 | ns | 0.40 $\pm$ 0.02   | 0.0023  | 0.55 $\pm$ 0.09    | 0.0144  |
| <b>IL-4</b>                     | 27.33 $\pm$ 26.33 | ns | 1.00 $\pm$ 0.0    | ns      | 1.00 $\pm$ 0.0    | ns      | 1.00 $\pm$ 0.0  | ns | 2.00 $\pm$ 1.00   | ns      | 10.00 $\pm$ 9.00  | ns      | 2.59 $\pm$ 1.59 | ns | 1.00 $\pm$ 0.0    | ns      | 1.00 $\pm$ 0.0     | ns      |
| <b>IL-5</b>                     | 0.92 $\pm$ 0.0    | ns | 0.98 $\pm$ 0.03   | ns      | 0.91 $\pm$ 0.07   | ns      | 1.04 $\pm$ 0.03 | ns | 1.02 $\pm$ 0.05   | ns      | 1.05 $\pm$ 0.09   | ns      | 1.30 $\pm$ 0.24 | ns | 1.18 $\pm$ 0.03   | ns      | 1.03 $\pm$ 0.01    | ns      |
| <b>IL-6</b>                     | 1.07 $\pm$ 0.10   | ns | 3.03 $\pm$ 0.30   | <0.0001 | 3.90 $\pm$ 0.13   | <0.0001 | 1.88 $\pm$ 0.03 | ns | 8.19 $\pm$ 1.14   | <0.0001 | 6.45 $\pm$ 0.23   | <0.0001 | 0.98 $\pm$ 0.11 | ns | 17.22 $\pm$ 1.50  | <0.0001 | 19.35 $\pm$ 1.27   | <0.0001 |
| <b>IL-7</b>                     | 0.93 $\pm$ 0.01   | ns | 1.29 $\pm$ 0.05   | 0.0011  | 1.43 $\pm$ 0.10   | 0.0137  | 1.00 $\pm$ 0.11 | ns | 2.74 $\pm$ 0.42   | 0.0024  | 3.08 $\pm$ 0.22   | 0.0006  | 0.70 $\pm$ 0.20 | ns | 2.18 $\pm$ 0.37   | 0.0269  | 2.60 $\pm$ 0.13    | 0.0043  |
| <b>IL-8</b>                     | 1.05 $\pm$ 0.07   | ns | 3.93 $\pm$ 0.20   | <0.0001 | 5.61 $\pm$ 0.24   | <0.0001 | 1.63 $\pm$ 0.04 | ns | 20.17 $\pm$ 2.30  | <0.0001 | 20.33 $\pm$ 0.72  | <0.0001 | 0.93 $\pm$ 0.05 | ns | 15.13 $\pm$ 1.42  | <0.0001 | 16.04 $\pm$ 0.78   | <0.0001 |
| <b>IP-10</b>                    | 1.04 $\pm$ 0.11   | ns | 1.73 $\pm$ 0.15   | ns      | 2.36 $\pm$ 0.14   | ns      | 1.94 $\pm$ 0.20 | ns | 34.92 $\pm$ 5.22  | <0.0001 | 29.34 $\pm$ 2.91  | <0.0001 | 0.96 $\pm$ 0.06 | ns | 12.59 $\pm$ 1.66  | <0.0001 | 14.71 $\pm$ 1.94   | 0.0001  |
| <b>MCP-1</b>                    | 0.96 $\pm$ 0.03   | ns | 1.07 $\pm$ 0.05   | ns      | 1.09 $\pm$ 0.02   | ns      | 1.03 $\pm$ 0.03 | ns | 1.95 $\pm$ 0.13   | 0.0004  | 1.85 $\pm$ 0.16   | 0.0002  | 1.07 $\pm$ 0.06 | ns | 1.14 $\pm$ 0.05   | ns      | 1.22 $\pm$ 0.04    | 0.039   |
| <b>MIP-1<math>\alpha</math></b> | 0.03 $\pm$ 0.02   | ns | 4.38 $\pm$ 0.97   | 0.0005  | 7.20 $\pm$ 1.14   | 0.0276  | 1.00 $\pm$ 0.0  | ns | 23.33 $\pm$ 22.33 | ns      | 5.33 $\pm$ 4.33   | ns      | 1.00 $\pm$ 0.0  | ns | 1176 $\pm$ 159.4  | <0.0001 | 1315.2 $\pm$ 84.85 | <0.0001 |
| <b>MIP-1<math>\beta</math></b>  | 1.00 $\pm$ 0.0    | ns | 48.00 $\pm$ 25.36 | ns      | 156.0 $\pm$ 46.13 | 0.003   | 1.00 $\pm$ 0.0  | ns | 160.7 $\pm$ 56.05 | 0.0046  | 148.7 $\pm$ 13.28 | 0.0077  | 1.00 $\pm$ 0.0  | ns | 598.6 $\pm$ 85.23 | <0.0001 | 686.9 $\pm$ 47.21  | <0.0001 |
| <b>TNF<math>\alpha</math></b>   | 1.17 $\pm$ 0.16   | ns | 5.30 $\pm$ 0.50   | <0.0001 | 7.03 $\pm$ 0.14   | <0.0001 | 1.23 $\pm$ 0.22 | ns | 9.06 $\pm$ 1.10   | <0.0001 | 8.73 $\pm$ 0.72   | <0.0001 | 1.35 $\pm$ 0.17 | ns | 15.60 $\pm$ 1.68  | <0.0001 | 18.36 $\pm$ 1.03   | <0.0001 |
| <b>TNF<math>\beta</math></b>    | 0.38 $\pm$ 0.17   | ns | 0.67 $\pm$ 0.52   | ns      | 1.05 $\pm$ 0.59   | ns      | 1.00 $\pm$ 0.0  | ns | 2.67 $\pm$ 1.67   | ns      | 3.00 $\pm$ 1.15   | ns      | 8.53 $\pm$ 7.53 | ns | 1.00 $\pm$ 0.0    | ns      | 3.40 $\pm$ 2.40    | ns      |
| <b>VEGF</b>                     | 0.87 $\pm$ 0.09   | ns | 0.98 $\pm$ 0.14   | ns      | 1.29 $\pm$ 0.04   | ns      | 1.11 $\pm$ 0.07 | ns | 2.10 $\pm$ 0.32   | 0.0027  | 2.02 $\pm$ 0.13   | 0.0047  | 0.83 $\pm$ 0.04 | ns | 1.29 $\pm$ 0.18   | ns      | 1.46 $\pm$ 0.02    | ns      |

Statistical analysis was conducted by one-way ANOVA with Tukey's correction for multiple comparisons.

Supplemental Table 6. Cytokine expression by THP-1 monocytes after exposure to bEVs derived from *L. crispatus*, *G. vaginalis*, and *M. mulieris* grown in NYC culture medium, expressed as fold-changes relative to NYC culture medium controls

|                 | <i>L. crispatus</i>  |                  | <i>G. vaginalis</i>  |                  | <i>M. mulieris</i>   |                  |
|-----------------|----------------------|------------------|----------------------|------------------|----------------------|------------------|
|                 | Fold-change<br>± SEM | Adjusted p-value | Fold-change ±<br>SEM | Adjusted p-value | Fold-change ±<br>SEM | Adjusted p-value |
| <b>EGF</b>      | 1.10 ± 1.09          | ns               | 11.52 ± 0.35         | <0.0001          | 19.59 ± 0.26         | <0.0001          |
| <b>Eotaxin</b>  | 1.00 ± 0.0           | ns               | 334.7 ± 173          | ns               | 761.3 ± 106.0        | 0.0005           |
| <b>G-CSF</b>    | 0.03 ± 0.0           | ns               | 61.03 ± 4.00         | <0.0001          | 157.0 ± 7.24         | <0.0001          |
| <b>GM-CSF</b>   | 1.24 ± 0.12          | ns               | 19.16 ± 2.03         | 0.0002           | 41.11 ± 3.58         | <0.0001          |
| <b>IFNα2</b>    | 5.67 ± 4.67          | ns               | 123.0 ± 72           | ns               | 192.3 ± 14.67        | 0.0072           |
| <b>IFNγ</b>     | 6.31 ± 1.24          | ns               | 13.88 ± 0.19         | <0.0001          | 15.58 ± 1.40         | <0.0001          |
| <b>IL-10</b>    | 0.38 ± 0.0           | ns               | 67.13 ± 3.95         | 0.0363           | 125.8 ± 33.63        | 0.0006           |
| <b>IL-12p40</b> | 0.25 ± 0.0           | ns               | 634.9 ± 53.81        | 0.0007           | 2733 ± 169.1         | <0.0001          |
| <b>IL-12p70</b> | 1.00 ± 0.0           | ns               | 15.67 ± 7.33         | ns               | 54.33 ± 4.33         | <0.0001          |
| <b>IL-13</b>    | 0.77 ± 0.34          | ns               | 2.24 ± 0.48          | ns               | 2.23 ± 0.24          | ns               |
| <b>IL-15</b>    | 0.40 ± 0.10          | ns               | 11.50 ± 1.40         | <0.0001          | 18.30 ± 0.60         | <0.0001          |
| <b>IL-17A</b>   | 1.39 ± 0.68          | ns               | 9.50 ± 1.84          | 0.0004           | 8.78 ± 0.91          | 0.0008           |
| <b>IL-1RA</b>   | 1.04 ± 0.06          | ns               | 15.11 ± 0.84         | <0.0001          | 21.60 ± 1.26         | <0.0001          |
| <b>IL-1α</b>    | 1.08 ± 0.15          | ns               | 5.28 ± 0.45          | ns               | 10.62 ± 4.17         | 0.052            |
| <b>IL-1β</b>    | 1.17 ± 0.08          | ns               | 62.70 ± 4.41         | 0.0009           | 154.9 ± 17.25        | <0.0001          |
| <b>IL-2</b>     | 1.14 ± 0.04          | ns               | 1.40 ± 0.03          | <0.0001          | 1.43 ± 0.02          | <0.0001          |
| <b>IL-3</b>     | 1.48 ± 0.06          | 0.0293           | 0.95 ± 0.19          | ns               | 0.85 ± 0.03          | ns               |
| <b>IL-4</b>     | 27.33 ±<br>24.85     | ns               | 97.00 ± 34.53        | 0.0428           | 188.3 ± 16.67        | 0.0006           |
| <b>IL-5</b>     | 0.91 ± 0.06          | ns               | 0.91 ± 0.05          | ns               | 1.01 ± 0.06          | ns               |
| <b>IL-6</b>     | 1.10 ± 0.03          | ns               | 43.48 ± 3.03         | 0.0002           | 152.0 ± 9.54         | <0.0001          |
| <b>IL-7</b>     | 1.00 ± 0.0           | ns               | 182.0 ± 34.78        | 0.0003           | 301.0 ± 28.69        | <0.0001          |

|               |                  |    |                   |         |                     |         |
|---------------|------------------|----|-------------------|---------|---------------------|---------|
| <b>IL-8</b>   | 3.69 ± 0.08      | ns | 945.9 ± 63.97     | <0.0001 | 1840 ± 70.28        | <0.0001 |
| <b>IP-10</b>  | 6.40 ± 0.56      | ns | 1627 ± 128.7      | <0.0001 | 1936 ± 85.10        | <0.0001 |
| <b>MCP-1</b>  | 1.62 ± 0.13      | ns | 182.6 ± 7.13      | <0.0001 | 195.5 ± 1.35        | <0.0001 |
| <b>MIP-1α</b> | 323.0 ±<br>28.50 | ns | 273600 ±<br>31290 | 0.049   | 1085000 ±<br>145700 | <0.0001 |
| <b>MIP-1β</b> | 4.16 ± 0.22      | ns | 2039 ± 44.92      | <0.0001 | 2000 ± 27.51        | <0.0001 |
| <b>TNFα</b>   | 1.10 ± 0.05      | ns | 51.91 ± 3.22      | <0.0001 | 146.2 ± 6.58        | <0.0001 |
| <b>TNFβ</b>   | 1.33 ± 0.44      | ns | 2.97 ± 0.26       | 0.0016  | 3.79 ± 0.08         | <0.0001 |
| <b>VEGF</b>   | 0.99 ± 0.07      | ns | 2.20 ± 0.22       | <0.0001 | 2.09 ± 0.06         | 0.0001  |

Statistical analysis was conducted by one-way ANOVA with Tukey's correction for multiple comparisons.

## Supplemental Movie Legends

Supplemental Video 1. Live video of *L. crispatus* bEV (red) uptake by endocervical cells (green) from 30 minutes-1 hour of exposure.

Supplemental Video 2. Live video of *L. crispatus* bEV (red) uptake by ectocervical cells (green) from 30 minutes-1 hour of exposure.

Supplemental Video 3. Live video of *L. crispatus* bEV (red) uptake by vaginal epithelial cells (green) from 30 minutes-1 hour of exposure.

Supplemental Video 4. Live video of *G. vaginalis* bEV (red) uptake by endocervical cells (green) from 30 minutes-1 hour of exposure.

Supplemental Video 5. Live video of *G. vaginalis* bEV (red) uptake by ectocervical cells (green) from 30 minutes-1 hour of exposure.

Supplemental Video 6. Live video of *G. vaginalis* bEV (red) uptake by vaginal epithelial cells (green) from 30 minutes-1 hour of exposure.

Supplemental Video 7. Live video of *M. mulieris* bEV (red) uptake by endocervical cells (green) from 30 minutes-1 hour of exposure.

Supplemental Video 8. Live video of *M. mulieris* bEV (red) uptake by ectocervical cells (green) from 30 minutes-1 hour of exposure.

Supplemental Video 9. Live video of *M. mulieris* bEV (red) uptake by vaginal epithelial cells (green) from 30 minutes-1 hour of exposure.

Supplemental Video 10. Live video of NYC control bEV isolates (red) uptake by endocervical cells (green) from 30 minutes-1 hour of exposure.

Supplemental Video 11. Live video of NYC control bEV isolates (red) uptake by ectocervical cells (green) from 30 minutes-1 hour of exposure.

Supplemental Video 12. Live video of NYC control bEV isolates (red) uptake by vaginal epithelial cells (green) from 30 minutes-1 hour of exposure.
